1 HEARING LOSS IN ALZHEIMER DISEASE IS ASSOCIATED WITH ALTERED SERUM  
2 LIPIDOMIC BIOMARKER PROFILES

3  
4 Daniel A. Llano<sup>1,2</sup>, Lina K. Issa<sup>1</sup>, Priya Devanarayan<sup>3</sup>, Viswanath Devanarayan<sup>4,5</sup>, Alzheimer's  
5 Disease Neuroimaging Initiative (ADNI).  
6

- 7 1. Molecular and Cellular Biology, University of Illinois at Urbana-Champaign, Urbana, IL,  
8 USA  
9 2. Carle Neuroscience Institute, Urbana, IL, USA  
10 3. Department of Biology and Schreyer Honors College, Pennsylvania State University,  
11 University Park, PA, USA  
12 4. GlaxoSmithKline, Collegeville, PA, USA  
13 5. Department of Mathematics, Statistics and Computer Science, University of Illinois at  
14 Chicago, Chicago, IL, USA  
15

16 Corresponding Author: Daniel A. Llano MD, PhD, [d-llano@illinois.edu](mailto:d-llano@illinois.edu)  
17

18 **Acknowledgment:**

19 The authors thank Dr. Dinesh Barupal for useful discussions regarding the ADNI lipidomics  
20 dataset.  
21

22 **Abstract:**

23 Recent data have found that aging-related hearing loss (ARHL) is associated with the  
24 development of Alzheimer Disease (AD). However, the nature of the relationship between these  
25 two disorders is not clear. There are multiple potential factors that link ARHL and AD, and  
26 previous groups have speculated that common metabolic dysregulation may underlie the  
27 propensity to develop both disorders. Here, we investigate the distribution of serum lipidomic  
28 biomarkers in AD subjects with or without hearing loss in a publicly available dataset. Serum  
29 levels of 349 known lipids from 16 lipid classes were measured in 185 AD patients. Using  
30 previously defined co-regulated sets of lipids, both age- and sex-adjusted, we found that lipid  
31 sets enriched in phosphatidylcholine and phosphatidylethanolamine showed a strong  
32 association with hearing loss. Examination of biochemical classes confirmed these relationships  
33 and found that serum phosphatidylcholine levels were significantly lower in AD subjects with  
34 hearing loss. A similar relationship was not found in normal subjects. These data suggest that a

35 synergistic relationship may exist between AD, hearing loss and metabolic biomarkers, such  
36 that in the context of a pathological state such as AD, alterations in serum metabolic profiles are  
37 also shared with hearing loss hearing loss. These data also point to a potential role for  
38 phosphatidylcholine, a molecule with antioxidant properties, in the underlying pathophysiology  
39 of ARHL in the context of AD, which has implications for our understanding and potential  
40 treatment of both disorders.

41

## 42 **Introduction:**

43 Aging-related hearing loss (ARHL) and Alzheimer Disease (AD) are common disabling  
44 disorders in the elderly. Over the age of 65, approximately 10% of individuals develop AD, while  
45 approximately 40% develop ARHL (Hebert, Weuve, Scherr, & Evans, 2013; Nash et al., 2011),  
46 Both are rising in prevalence as the population ages, with an estimated 83 million individuals  
47 over the age of 65 in the U.S. by the year 2050 (Ortman, Velkoff, & Hogan, 2014). Recent data  
48 have revealed an association between these two disorders, such that the likelihood of  
49 developing cognitive impairment, and ultimately AD, is increased in individuals with ARHL (Ford  
50 et al., 2018; Golub et al., 2017; Lin, Ferrucci, et al., 2011; Lin, Metter, et al., 2011; Lin, Thorpe,  
51 Gordon-Salant, & Ferrucci, 2011; Lin et al., 2013; Panza, Solfrizzi, & Logroscino, 2015;  
52 Thomson, Auduong, Miller, & Gurgel, 2017). This relationship holds true even when adjusting  
53 for age, sex and multiple other potentially confounding variables such as comorbid illness. A  
54 causal association has not been identified, though multiple mechanisms by which hearing loss  
55 may lead to AD have been proposed (reviewed in (Nadhimi & Llano, 2020)).

56 ARHL and AD do share several potential biological substrates. Both are associated with  
57 metabolic stress and diminished mitochondrial function (Fujimoto & Yamasoba, 2014; Wang et  
58 al., 2014). ARHL is also associated with more traditional markers of AD such as increases in  
59 CSF tau or diminished hippocampal and entorhinal cortical volume (Xu et al., 2019). Recently, it  
60 has been suggested that AD may be associated with widespread dysregulation of lipid  
61 metabolism (Kao, Ho, Tu, Jou, & Tsai, 2020) and plasma lipid profiles have been shown to  
62 correlate with multiple AD-related biomarkers (Barupal et al., 2019). Lipid dysregulation may  
63 also play a role in the development of hearing loss (Campbell, Rybak, & Khardori, 1996). It is  
64 therefore possible that an underlying process of metabolic dysregulation, including altered lipid  
65 homeostasis, may account for the relationship between AD and ARHL.

66 Lipids are a major component of biological membranes and integral for neuronal function.  
67 The term lipids encompasses all fatty acids and their derivatives; the three main classes of lipids  
68 are triglycerides, phospholipids, and sterols. Lipid metabolism is the catabolic and synthetic

69 mechanism through which energy is extracted from fats and fats are produced, respectively.  
70 The availability of lipids is derived from three sources: our diet, adipose tissue storage, and the  
71 liver's synthetic capacity. Fats ingested in the diet enter the gastrointestinal tract, digested by  
72 pancreatic lipases in the small intestine and then imported across the intestinal mucosa where  
73 they are resynthesized. The resynthesized fats are then packaged along with cholesterol into  
74 chylomicrons which allow for nonpolar substances to move within the aqueous environment of  
75 our lymphatic and circulatory systems. These fats are then oxidized through  $\beta$ -oxidation for  
76 energy production or re-esterized for storage in adipose tissue. Alternatively, the resynthesized  
77 fats in the small intestine can be distributed to the liver through portal circulation or to adipose  
78 tissue. Lipids derived from endogenous synthesis in the liver are packaged into very-low-density  
79 lipoproteins that are transported to tissue or stored in adipose tissue. Fat stores in adipose  
80 tissue are mobilized for energy production by the action of hormone-sensitive lipase as needed.

81 Given the potential roles for lipids dysregulation in both AD and ARHL, in the current study,  
82 we examined the distribution of serum lipids in subjects with AD, with and without hearing loss,  
83 using a publicly-available dataset (Alzheimer Disease Neuroimaging Initiative, ADNI).

84

#### 85 **Methods:**

##### 86 *Database:*

87 The ADNI database ([adni.loni.usc.edu](http://adni.loni.usc.edu)) utilized in this research was launched in 2003 as a  
88 public-private partnership, led by Principal Investigator Michael W. Weiner, MD. The primary  
89 goal of ADNI has been to test whether serial MRI, PET, other biological markers, and clinical  
90 and neuropsychological assessments can be combined to measure the progression of MCI and  
91 early AD. For up-to-date information, see [www.adni-info.org](http://www.adni-info.org). This study was conducted across  
92 multiple clinical sites and was approved by the Institutional Review Boards of all of the  
93 participating institutions. Informed written consent was obtained from all participants at each  
94 site. Data used for the analyses presented here were accessed on June 25, 2020.

95

##### 96 *Lipid analysis:*

97 Details of lipid extraction and measurement as well as quality control measures have been  
98 previously described (Barupal et al., 2018). In brief, fasting serum samples were obtained from  
99 subjects during the baseline visit. Lipids were extracted using organic solvents. Serum extracts  
100 were then analyzed using liquid chromatography with mass spectrometry. After quality control  
101 measures, we have data from a total of 349 known lipids from 16 classes (see Table 1 for listing  
102 of lipid classes). The lipid subclasses in the ADNI serum lipidomics data set used in this study

103 include acylcarnitine, fatty acid, cholesteryl ester, lysophosphatidylcholine,  
104 lysophosphatidylethanolamine, phosphatidylcholine, phosphatidylethanolamine,  
105 phosphatidylinositol, plasmalogen phosphatidylcholine, plasmalogen phosphatidylethanolamine,  
106 ceramide, glucosylceramide, sphingomyelin, diacylglycerol, and triacylglycerol (see Table 1 for  
107 listing of lipid classes).

108

#### 109 *Hearing loss assessment:*

110 Hearing was not systematically measured in the ADNI database. Similar to a previous report  
111 (Xu et al., 2019), we used subjective hearing loss complaints found in the following datasheets  
112 (downloaded June 25, 2020): ADSXLIST.csv, BLSCHECK.csv, INITHEALTH.csv,  
113 MEDHIST.csv, NEUROEXM.csv, PHYSICAL.csv, RECBLLOG.csv, RECMHIST.csv. We used  
114 the search terms “hear”, “auditory”, “ear”, “deaf”, “presbycusis”, and “HOH (hard of hearing)” and  
115 eliminated those reports that were clearly not related to aging-related hearing loss (e.g., skin  
116 cancer on ear, earwax, etc.) and eliminated duplicates. Subjects having a hearing complaint are  
117 labeled in this study as “hearing loss” or HL. Other subjects are listed as “non-hearing loss” or  
118 NHL, notwithstanding the fact that hearing was not objectively measured (see below).

119

#### 120 *Statistical Methods:*

121 The effect of each individual lipid species on hearing loss in AD subjects was assessed via  
122 analysis of covariance (ANCOVA) after adjusting for gender and age as covariates, and log  
123 transforming the lipid expression values. Samples with absolute value of studentized residuals  
124 from this model exceeding 3 were identified as outliers and excluded from further analysis. The  
125 summary measures reported from this analysis include the area under the Receiver Operating  
126 Characteristic curve (ROC AUC), covariates-adjusted significance (p-value), and false discovery  
127 rate (Benjamini & Hochberg, 1995).

128 The effect of each of the 16 known lipid classes and 28 empirically derived lipid sets  
129 (Barupal et al., 2019) on hearing loss in AD subjects was assessed via “lipid set analysis”  
130 (LSA). See supplementary Table 1 for a listing of the lipids in each of the 28 sets. This LSA  
131 analysis on the lipid classes and lipid sets was based on the maxmean statistic of the gene-set-  
132 analysis algorithm (Efron & Tibshirani, 2007). which was applied on the residuals from the  
133 above ANCOVA model on the individual lipid species in order to adjust for the effects of age  
134 and gender. Individual subject level standardized composite scores were determined for each  
135 lipid class and each lipid set from this algorithm. These scores were then used to assess the  
136 effect of each of the lipid classes and lipid sets on hearing loss in AD subjects. The results were

137 summarized in terms of ROC-AUC, covariates-adjusted significance (p-value) and false  
138 discovery rate (q-value). Lipid sets with q-value < 0.05 were considered as statistically  
139 significant. The corresponding lipid classes and individual lipid species with Bonferroni  
140 adjusted p-value < 0.05 were highlighted and studied further in terms of their potential  
141 connections to hearing loss in AD subjects.

142

## 143 **Results:**

### 144 *Demographics:*

145 Data were obtained from 185 subjects with AD. Of the 185, 40 (21.6%) reported hearing loss  
146 (HL). HL subjects were not significantly different in age than NHL subjects (HL:  $77.2 \pm 5.8$  years  
147 [SD], NHL:  $74.8 \pm 7.7$  years [SD],  $p > 0.05$ ). HL subjects were more likely to be men than control  
148 subjects (NHL = 47% men, HL = 68% men,  $p < 0.05$ , Chi-Square). HL and control subjects did  
149 not differ significantly in average ADAS13 scores (HL:  $30.4 \pm 8.0$  [SD], NHL:  $28.8 \pm 7.6$  [SD],  $p >$   
150  $0.05$ ) or body mass index (HL:  $26.0 \pm 4.1$  kg/m<sup>2</sup> [SD], NHL:  $25.3 \pm 3.8$  kg/m<sup>2</sup> [SD],  $p > 0.05$ , see  
151 Table 2).

152

### 153 *Lipidomic biomarker sets that separate HL from NHL subjects:*

154 Levels of 349 lipids were measured across 16 classes. Because levels of many of the lipids are  
155 strongly correlated due to co-regulation, and because of the high potential for false discovery  
156 when comparing the levels of all 349 lipids, we attempted to reduce the data by grouping the  
157 lipids. A previous report measured correlations between all of the serum lipid biomarkers, and  
158 using a dynamic clustering algorithm known as dynamicTreeCut, determined that 28 co-  
159 regulated sets of lipids were present (Barupal et al., 2019). They also found that many of these  
160 lipid sets were associated with either AD diagnosis or AD biomarkers. Although most of the sets  
161 were homogeneous (or near-homogeneous) clusters of single lipid types, others comprised a  
162 mixture of lipids (see supplementary Table 1 for listing of lipids in each class).

163 Given the robust performance of these clusters to signal changes in AD biomarkers, we  
164 asked whether these same clusters were also associated with the presence of HL. The p- and  
165 q- values for the 28 groups of lipids are shown in Table 3. We found that two sets of lipids  
166 correlated with the presence of hearing loss: set 23 and set 4, both with p- and q-values below  
167 0.05, with set 23 producing the best performance. We therefore focused on the lipids found in  
168 these two sets for subsequent analyses of lipid class and individual lipids.

169

### 170 *Lipid classes and individual lipids that separate HL from NHL subjects:*

171 Using the biomarker sets to narrow our hypotheses about which lipids exhibit signal changes in  
172 hearing, we attempted to determine which lipid classes were most significantly associated with  
173 HL. Within the two top sets identified above, 25 lipids in 7 classes were identified, with only the  
174 phosphatidylcholine class surviving correction for multiple comparisons (uncorrected p-value =  
175 0.0057, Bonferroni corrected to 0.04). See Figure 1 for boxplots of the 7 biomarker classes  
176 comparing HL and NHL subjects See Table 4 for a listing of lipid classes found in sets 4 and 23  
177 and their associated capacity to separate HL from NHL subjects.  
178

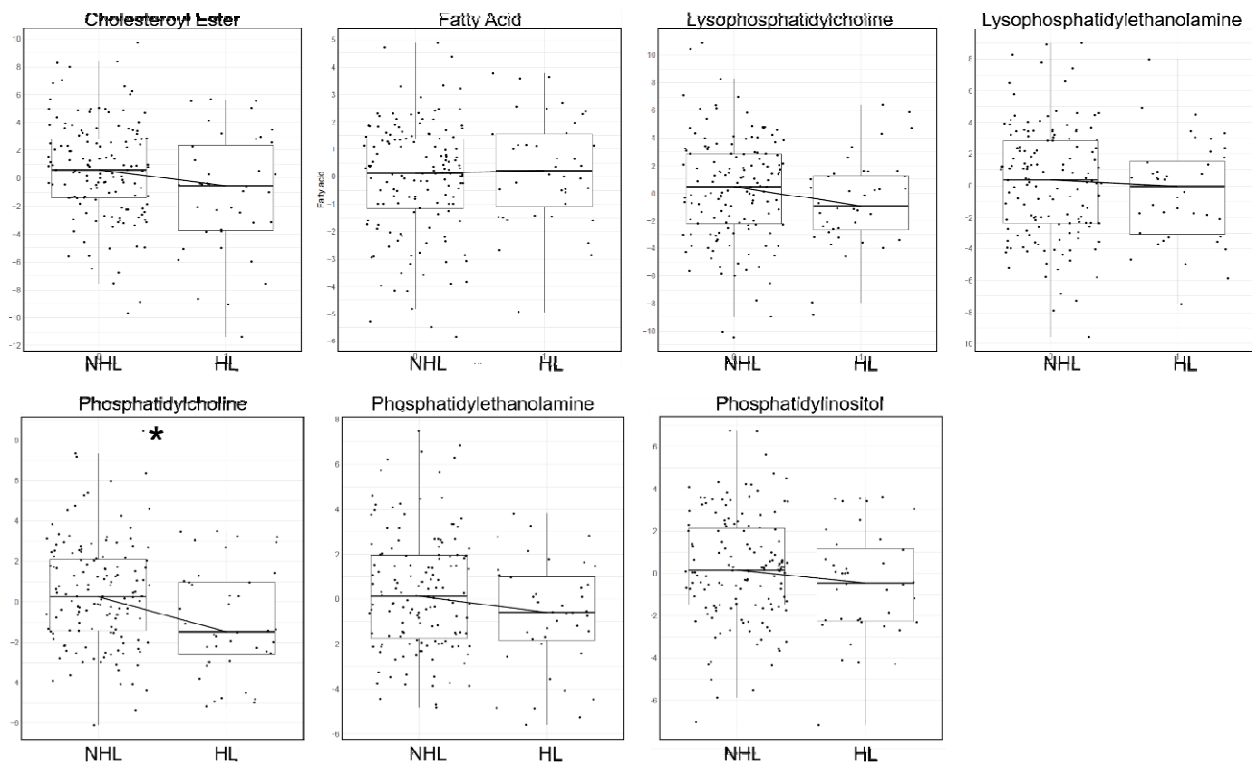

179  
180 *Figure 1: Box plots showing the mean, first and third quartiles of the distributions, demonstrating*  
181 *differences in levels of lipids in the seven classes of lipids identified as parts of sets 4 and 23*  
182 *from (Barupal et al., 2019), distinguishing between HL and NHL subjects. Shown are*  
183 *standardized values (centered by mean and divided by standard deviation), after adjusting for*  
184 *age and gender as covariates. \* Bonferroni-corrected p-value of < 0.05.*  
185

186 Using the 25 lipids identified above, the most commonly-appearing lipid class was  
187 phosphatidylcholine (14/25 lipids or 56%), which is significantly greater than the proportion of all  
188 tested lipids that were in the phosphatidylcholine class (82/349 lipids or 23.4%,  $p < 0.05$ , Chi-  
189 Squared test). See Table 5 for a listing of individual lipids in sets 4 and 23 and their associated  
190 capacity to separate HL from NHL subjects. Both of these analyses point to phosphatidylcholine  
191 levels as the main factor distinguishing between HL and NHL subjects.

192

193 *Analysis of non-AD subjects and APOE:*

194 Similar analyses were done in subjects with mild cognitive impairment (MCI) and control  
195 subjects without memory loss. None of the lipid sets were found to differentiate HL from NHL  
196 subjects in either control or MCI cohorts. Subjects across all groups (control, MCI and AD) were  
197 also separated based on genotype (having at least one copy of APOE4 or none), and no  
198 association was found between genotype and likelihood of HL.

199

## 200 **Discussion:**

201 In the current study, 349 serum biomarkers were measured in 185 subjects with AD. Using  
202 previously-identified co-regulated sets of biomarkers (Barupal et al., 2019), we found two sets of  
203 lipids that were strongly associated with the presence of HL. Within these sets, the most  
204 common class of lipids was phosphatidylcholine, and as a class and as individual biomarkers,  
205 phosphatidylcholines were found to be significantly diminished in individuals with HL. Similar  
206 analyses in non-AD subjects (control and MCI) did not reveal significant associations between  
207 lipidomic biomarkers and HL

208

209 *Weaknesses in the study:*

210 Hearing loss in this study was assessed in a non-systematic way – via reports obtained from the  
211 subjects. Previous data have established concordance values between subjective and objective  
212 hearing loss ranging from 65-77% depending on demographic factors (Kamil, Genther, & Lin,  
213 2015). Although there are several publicly-available databases that have measured hearing loss  
214 objectively (e.g., Baltimore Longitudinal Study of Aging or National Health and Nutrition  
215 Examination Survey), these did not systematically measure an extensive panel of lipid  
216 biomarkers. Conversely, despite the richness of biomarker data available in ADNI, hearing was  
217 not systematically measured. Thus, additional future work in subjects with objectively-measured  
218 hearing loss will be required to confirm the associations reported here.

219 In addition, as an observational study, the current work cannot be used to support the idea  
220 that supplementation of phosphatidylcholine can protect against ARHL in subjects with AD. It is  
221 possible that phosphatidylcholine levels and ARHL are related by a third, unmeasured, factor.  
222 Only a prospective, randomized and blinded trial can determine whether phosphatidylcholine  
223 can improve ARHL.

224

225 *Phosphatidylcholine, Alzheimer Disease and hearing loss:*

226 Phosphatidylcholine is one of the major phospholipids and a fundamental structural component  
227 of cell membranes. Previous studies have shown that polyunsaturated phosphatidylcholine in  
228 the plasma membrane serves more than just a structural role; it also plays a rate-limiting role in  
229 the activation of enzymatic antioxidants situated in the cell membrane. These antioxidants serve  
230 to protect the cell membrane from damage by reactive oxygen species; they include superoxide  
231 dismutase and glutathione, catalase, glutathione S-transferase, and glutathione peroxidase  
232 (Seidman, Khan, Tang, & Quirk, 2002). The process of lipid peroxidation has previously been  
233 linked to the presence of free radicals (Su et al., 2019); meaning that reactive oxygen species  
234 have also been implicated in injury to polyunsaturated fatty acids in the cell membrane  
235 ultimately resulting in cell membrane damage (Seidman et al., 2002). The effects of reactive  
236 oxygen species on cell death are well established and it is well known that these radicals can  
237 lead to either apoptosis or oncotic necrosis depending on whether there's significant ATP  
238 depletion in the cell or if an executioner caspase is activated, respectively. Reactive oxygen  
239 species arise from normal mitochondrial respiration and their generation is found to be  
240 increased during periods of prolonged hypoperfusion. As an implication of aging, one can  
241 expect to observe decreased blood flow within the circulatory system, specifically in the inner  
242 ear (Seidman et al., 2002). The cochlea is further vulnerable to oxidative stress due to  
243 increased mitochondrial respiration from the high metabolic demands of their mechanosensory  
244 hair cells. These increased levels of reactive oxygen species leading to oxidative stress can  
245 ultimately lead to permanent cochlear degeneration as is seen in patients with hearing loss  
246 (Gonzalez-Gonzalez, 2017).

247 The lipids measured in this study were extracted from blood samples which brings about  
248 the question of how lipids enter circulation. Fats ingested through our diet reach the small  
249 intestine where short- and medium-chain fatty acids are absorbed directly into the blood via  
250 intestine capillaries and travel through the portal vein. In the liver, fat is packaged into very low  
251 density lipoproteins for transport in the bloodstream to extrahepatic tissues. On the contrary,  
252 long-chain fatty acids are absorbed intact in the small intestine, incorporated into chylomicrons,  
253 and secreted into lymphatic circulation. Additionally, adipocytes can release stored fatty acids  
254 into the blood as lipid levels in the blood decrease. Increasing evidence suggests that some  
255 fatty acids can be synthesized in the brain, but that essential fatty acids still have to be  
256 transported across the blood-brain barrier (Bruce, Zsombok, & Eckel, 2017). Additional studies  
257 further suggest that this is a dynamic process with active daily turnover (Rapoport, Chang, &  
258 Spector, 2001). The exact mechanism behind how fats enter the brain is still unclear. One study  
259 performed on cholesterol homeostasis and hearing loss indicates that since the blood-brain



260 barrier prevents the uptake of this lipoprotein from circulation, all brain cholesterol is  
261 synthesized in astrocytes; further, excess cholesterol is metabolized into 24 (S)-  
262 hydroxycholesterol before secretion from the blood-brain barrier to the liver (Malgrange, Varela-  
263 Nieto, de Medina, & Paillasse, 2015).

264 Regarding phospholipids like phosphatidylcholine, the rat brain has been shown to be  
265 capable of synthesizing phosphatidylcholine via the phosphatidylethanolamine N -  
266 methyltransferase pathway (Crews, Hirata, & Axelrod, 1980) and CDP-choline pathway  
267 (Paoletti, Elena, Domizi, & Banchio, 2011). In addition to the synthetic capacity of brain tissue,  
268 some believe that although circulating phosphatidylcholine cannot cross the blood-brain barrier,  
269 its choline component has the ability to do so through the action of choline transporters; once  
270 this choline enters the brain, it can then be incorporated into the brain's own PC (Allen &  
271 Lockman, 2003). Increasing evidence has also shown that there is a net efflux of choline from  
272 the brain via a carrier-mediated efflux transporter system; this system plays an important role in  
273 choline turnover in the brain (Lee & Kang, 2008).

274 There has also been evidence of altered phosphatidylcholine metabolism in AD (Whiley et  
275 al., 2014; Zamroziewicz, Zwilling, & Barbey, 2016). PCs interact with ApoE as part of the HDL  
276 group, and are implicated in cholesterol transport. The enzymes that catalyze the breakdown of  
277 phosphatidylcholine to phosphatidate, or glycerophosphocholine and free fatty acids have been  
278 directly associated with AD. Alterations in reaction cascades of phospholipase D enzymes has  
279 been linked to neurodegenerative processes, with activation of phospholipase A2 family  
280 enzymes by A $\beta$  peptide in neurons, in turn releasing secondary lipid messengers (Sanchez-  
281 Mejia & Mucke, 2010). A 2014 study concluded that phosphatidylcholine regulation was affected  
282 in AD, and that it could be linked to the roles of phospholipase A2 and phospholipase D1 in A $\beta$   
283 activation (Whiley et al., 2014). A 2019 study reports that plasma levels of phosphatidylcholine-  
284 DHA have been found to predict the occurrence of dementia (Patrick, 2019).  
285 Phosphatidylcholine-DHA levels in the highest quartile had 47% lower risk of dementia than  
286 those with levels in lower 3 quartiles, independent of ApoE4 allele. Low levels of lysoPC  
287 predicted diagnosis of mild dementia and AD within 2-3 year with 90% accuracy (Patrick, 2019).  
288 Low plasma phosphatidylcholine levels as well as their components (long-chain polyunsaturated  
289 fatty acid docosahexaenoic acid and choline) have been found are predictive of cognitive  
290 decline (Zamroziewicz et al., 2016).

291

292 *Conclusion:*

293 Thus, in the current study, we observed that in the context of AD, lower serum levels of  
294 phosphatidylcholine were associated with ARHL. The fact that this association was found in AD  
295 subjects, but not in non-AD subjects, suggests that there is an interaction between the presence  
296 of AD and the relationship between phosphatidylcholine and ARHL. Given that AD is associated  
297 with diminished brain mitochondrial function and increased levels of lipid peroxidation, it is  
298 possible that individuals with AD may not have the metabolic reserve to withstand additional  
299 metabolic stressors, such as declining levels of antioxidant molecules such as  
300 phosphatidylcholine. These data also suggest that normalizing phosphatidylcholine levels in AD  
301 subjects, but not in non-AD subjects, may have a role in for the treatment or prevention of  
302 ARHL. Future studies will need to be done to investigate the potential therapeutic role of  
303 phosphatidylcholine in this context.

304

305 **Tables:**

306 Table 1: Listing of lipid classes in the current study

| Lipid Classes                | Lipid Count |
|------------------------------|-------------|
| Acylcarnitine                | 9           |
| Ceramide                     | 19          |
| Cholesterol                  | 1           |
| Cholesteroyl ester           | 8           |
| Diacylglycerol               | 13          |
| Fatty acid                   | 29          |
| Glactoylceramide             | 1           |
| Glucosylceramide             | 6           |
| Lactosylceramide             | 1           |
| Lysophosphatidylcholine      | 22          |
| Lysophosphatidylethanolamine | 4           |
| Phosphatidylcholine          | 82          |
| Phosphatidylethanolamine     | 25          |
| Phosphatidylinositol         | 11          |
| Sphingomyelin                | 34          |
| Triacylglycerol              | 84          |

307

308

309 Table 2: Demographic variables. \*p<0.05

|                                              |          | <b>NHL</b>     | <b>HL</b>        |
|----------------------------------------------|----------|----------------|------------------|
| <b>n (# of AD subjects)</b>                  |          | 145            | 40 <sup>11</sup> |
| <b>Gender* (n)</b>                           | <b>F</b> | 77             | 13               |
|                                              | <b>M</b> | 68             | 27               |
| <b>Age in years (Mean +/- SD)</b>            |          | 74.8<br>(7.7)  | 77.2<br>(5.8)    |
| <b>BMI in kg/m<sup>2</sup> (Mean +/- SD)</b> |          | 25.32<br>(3.8) | 26<br>(4.1)      |
| <b>ADAS13 (Mean +/- SD)</b>                  |          | 28.6<br>(7.6)  | 30.4<br>(8)      |

312 Table 3: Table of lipid sets derived from from Barupal et al. 2019 and their performance in  
 313 distinguishing HL from NHL subjects. ROC AUC = receiver-operator characteristic area under  
 314 the curve.

| Lipid Set | Median (HN) | Median (HL) | ROC AUC | p-value (unadj.) | q-value (FDR-BH) |
|-----------|-------------|-------------|---------|------------------|------------------|
| Set.23    | 0.54        | -2.1        | 0.66    | 0.0006           | 0.0175           |
| Set.4     | 0.16        | -1.06       | 0.64    | 0.0032           | 0.0447           |
| Set.6     | -0.05       | 0.35        | 0.62    | 0.0148           | 0.1332           |
| Set.25    | 1           | -1.3        | 0.62    | 0.019            | 0.1332           |
| Set.3     | 0.37        | -0.74       | 0.6     | 0.0297           | 0.1664           |
| Set.16    | -0.16       | 0.27        | 0.59    | 0.0529           | 0.2171           |
| Set.10    | 0.26        | -1.18       | 0.6     | 0.0543           | 0.2171           |
| Set.14    | 0.51        | -1.16       | 0.6     | 0.0705           | 0.2467           |
| Set.11    | 0.55        | -1.21       | 0.61    | 0.0802           | 0.2495           |
| Set.27    | 0.6         | -1.61       | 0.58    | 0.1025           | 0.2871           |
| Set.19    | 0.2         | -0.35       | 0.58    | 0.1238           | 0.3014           |
| Set.7     | 0.06        | -0.74       | 0.58    | 0.1292           | 0.3014           |
| Set.8     | 0.31        | -0.26       | 0.57    | 0.1694           | 0.3467           |
| Set.28    | 0.4         | -0.12       | 0.56    | 0.1788           | 0.3467           |
| Set.15    | 0.71        | -0.31       | 0.56    | 0.1857           | 0.3467           |
| Set.20    | 0.22        | -0.45       | 0.56    | 0.2013           | 0.3523           |
| Set.13    | -0.67       | -1.3        | 0.56    | 0.2554           | 0.4206           |
| Set.17    | 0.34        | 0.2         | 0.47    | 0.2836           | 0.4387           |
| Set.24    | -0.4        | -1.43       | 0.56    | 0.3135           | 0.4387           |
| Set.2     | -0.2        | 0.25        | 0.47    | 0.3153           | 0.4387           |
| Set.9     | 0.54        | -0.33       | 0.55    | 0.329            | 0.4387           |
| Set.1     | -0.3        | -1.07       | 0.55    | 0.3879           | 0.4937           |
| Set.26    | 0.02        | 0.58        | 0.48    | 0.4248           | 0.5171           |
| Set.22    | -0.18       | -0.35       | 0.53    | 0.4606           | 0.5359           |
| Set.18    | -0.1        | -0.68       | 0.54    | 0.4785           | 0.5359           |
| Set.5     | 0.54        | -0.55       | 0.53    | 0.6265           | 0.6747           |
| Set.21    | -0.21       | 0.32        | 0.5     | 0.8784           | 0.9109           |
| Set.12    | 0.09        | 0.07        | 0.51    | 0.9827           | 0.9827           |

315

316

317

318 Table 4 Table of lipid classes derived from sets 4 and 23 from Barupal et al. 2019 and their  
319 performance in distinguishing HL from NHL subjects.

| <b>Lipid Class</b>           | <b>Median (NHL)</b> | <b>Median (HL)</b> | <b>ROC AUC</b> | <b>p-value</b> |
|------------------------------|---------------------|--------------------|----------------|----------------|
| Phosphatidylcholine          | 0.25                | -1.48              | 0.63           | 0.0057         |
| Phosphatidylethanolamine     | 0.13                | -0.6               | 0.59           | 0.0216         |
| Cholesteroyl.ester           | 0.58                | -0.53              | 0.62           | 0.0239         |
| Phosphatidylinositol         | 0.16                | -0.45              | 0.58           | 0.1142         |
| Lysophosphatidylcholine      | 0.48                | -0.93              | 0.58           | 0.1255         |
| Lysophosphatidylethanolamine | 0.35                | -0.02              | 0.55           | 0.3185         |
| Fatty.acid                   | 0.12                | 0.22               | 0.54           | 0.3344         |

320

321 Table 5: Table of lipids derived from sets 4 and 23 from Barupal et al. 2019 and their  
 322 performance in distinguishing HL from NHL subjects.

| Lipid ID      | Lipid Class                  | Lipid Set | Median (NHL) | Median (HL) | Fold Change (HL/HLN) | p-value |
|---------------|------------------------------|-----------|--------------|-------------|----------------------|---------|
| UCD.Lipid.162 | Phosphatidylcholine          | Set-23    | 63671        | 52397       | 0.82                 | 0.0003  |
| UCD.Lipid.163 | Phosphatidylcholine          | Set-23    | 29367        | 24419.5     | 0.83                 | 0.0006  |
| UCD.Lipid.148 | Phosphatidylcholine          | Set-4     | 5056746      | 4380450.5   | 0.87                 | 0.0010  |
| UCD.Lipid.161 | Phosphatidylcholine          | Set-23    | 46893        | 39148.5     | 0.83                 | 0.0014  |
| UCD.Lipid.164 | Phosphatidylcholine          | Set-23    | 20525        | 16734.5     | 0.82                 | 0.0033  |
| UCD.Lipid.17  | Cholesteroyl ester           | Set-4     | 254617       | 198944.5    | 0.78                 | 0.0055  |
| UCD.Lipid.150 | Phosphatidylcholine          | Set-4     | 58706        | 49712       | 0.85                 | 0.0069  |
| UCD.Lipid.406 | Phosphatidylcholine          | Set-4     | 130587       | 116420      | 0.89                 | 0.0079  |
| UCD.Lipid.128 | Lysophosphatidylcholine      | Set-4     | 45190        | 37318.5     | 0.83                 | 0.0130  |
| UCD.Lipid.451 | Phosphatidylethanolamine     | Set-23    | 5726.33      | 4968        | 0.87                 | 0.0149  |
| UCD.Lipid.143 | Phosphatidylcholine          | Set-4     | 23780        | 19794       | 0.83                 | 0.0150  |
| UCD.Lipid.409 | Phosphatidylcholine          | Set-4     | 69527        | 57894       | 0.83                 | 0.0163  |
| UCD.Lipid.149 | Phosphatidylcholine          | Set-4     | 35516.5      | 27777       | 0.78                 | 0.0166  |
| UCD.Lipid.462 | Phosphatidylinositol         | Set-4     | 9408         | 8256        | 0.88                 | 0.0183  |
| UCD.Lipid.447 | Phosphatidylethanolamine     | Set-23    | 12761        | 11301.5     | 0.89                 | 0.0197  |
| UCD.Lipid.450 | Phosphatidylethanolamine     | Set-23    | 12513.79     | 10888.5     | 0.87                 | 0.0217  |
| UCD.Lipid.410 | Phosphatidylcholine          | Set-4     | 7910         | 7552        | 0.95                 | 0.0310  |
| UCD.Lipid.145 | Phosphatidylcholine          | Set-4     | 22891        | 19311       | 0.84                 | 0.0329  |
| UCD.Lipid.126 | Lysophosphatidylcholine      | Set-4     | 14172.5      | 12585       | 0.89                 | 0.0428  |
| UCD.Lipid.399 | Phosphatidylcholine          | Set-4     | 98283        | 79011       | 0.80                 | 0.0661  |
| UCD.Lipid.16  | Cholesteroyl ester           | Set-4     | 179126       | 125757      | 0.70                 | 0.0846  |
| UCD.Lipid.442 | Phosphatidylethanolamine     | Set-4     | 1817.5       | 1492        | 0.82                 | 0.1016  |
| UCD.Lipid.381 | Lysophosphatidylethanolamine | Set-4     | 5577.5       | 5206        | 0.93                 | 0.2087  |
| UCD.Lipid.517 | Fatty acid                   | Set-4     | 111966       | 100323      | 0.90                 | 0.5032  |
| UCD.Lipid.513 | Fatty acid                   | Set-4     | 22307        | 21665       | 0.97                 | 0.7021  |

323

324

325 **References:**

- 326 Allen, D., & Lockman, P. (2003). The blood-brain barrier choline transporter as a brain drug  
327 delivery vector. *Life sciences*, 73(13), 1609-1615.
- 328 Barupal, D. K., Baillie, R., Fan, S., Saykin, A. J., Meikle, P. J., Arnold, M., . . . ADNI. (2019).  
329 Sets of coregulated serum lipids are associated with Alzheimer's disease  
330 pathophysiology. *Alzheimer's & Dementia: Diagnosis, Assessment & Disease*  
331 *Monitoring*, 11, 619-627.
- 332 Barupal, D. K., Fan, S., Wancewicz, B., Cajka, T., Sa, M., Showalter, M. R., . . . Kaddurah-  
333 Daouk, R. (2018). Generation and quality control of lipidomics data for the alzheimer's  
334 disease neuroimaging initiative cohort. *Scientific data*, 5, 180263.
- 335 Benjamini, Y., & Hochberg, Y. (1995). Controlling the false discovery rate: a practical and  
336 powerful approach to multiple testing. *Journal of the Royal statistical society: series B*  
337 *(Methodological)*, 57(1), 289-300.
- 338 Bruce, K. D., Zsombok, A., & Eckel, R. H. (2017). Lipid processing in the brain: a key regulator  
339 of systemic metabolism. *Frontiers in endocrinology*, 8, 60.
- 340 Campbell, K. C., Rybak, L. P., & Khardori, R. (1996). Sensorineural hearing loss and  
341 dyslipidemia. *American journal of audiology*, 5(3), 11-14.
- 342 Crews, F. T., Hirata, F., & Axelrod, J. (1980). Identification and properties of methyltransferases  
343 that synthesize phosphatidylcholine in rat brain synaptosomes. *Journal of*  
344 *neurochemistry*, 34(6), 1491-1498.
- 345 Efron, B., & Tibshirani, R. (2007). On testing the significance of sets of genes. *The annals of*  
346 *applied statistics*, 1(1), 107-129.
- 347 Ford, A. H., Hankey, G. J., Yeap, B. B., Golledge, J., Flicker, L., & Almeida, O. P. (2018).  
348 Hearing loss and the risk of dementia in later life. *Maturitas*, 112, 1-11.
- 349 Fujimoto, C., & Yamasoba, T. (2014). Oxidative stresses and mitochondrial dysfunction in age-  
350 related hearing loss. *Oxidative medicine and cellular longevity*, 2014.
- 351 Golub, J. S., Luchsinger, J. A., Manly, J. J., Stern, Y., Mayeux, R., & Schupf, N. (2017).  
352 Observed hearing loss and incident dementia in a multiethnic cohort. *Journal of the*  
353 *American Geriatrics Society*, 65(8), 1691-1697.
- 354 Gonzalez-Gonzalez, S. (2017). The role of mitochondrial oxidative stress in hearing loss.  
355 *Neurol. Disord. Ther*, 1, 1-5.
- 356 Hebert, L. E., Weuve, J., Scherr, P. A., & Evans, D. A. (2013). Alzheimer disease in the United  
357 States (2010–2050) estimated using the 2010 census. *Neurology*, 80(19), 1778-1783.
- 358 Kamil, R. J., Genther, D. J., & Lin, F. R. (2015). Factors associated with the accuracy of  
359 subjective assessments of hearing impairment. *Ear and hearing*, 36(1), 164.
- 360 Kao, Y.-C., Ho, P.-C., Tu, Y.-K., Jou, I., & Tsai, K.-J. (2020). Lipids and Alzheimer's Disease.  
361 *International journal of molecular sciences*, 21(4), 1505.
- 362 Lee, N.-Y., & Kang, Y.-S. (2008). The efflux transport of choline through blood-brain barrier is  
363 inhibited by Alzheimer's disease therapeutics. *Biomolecules & Therapeutics*, 16(3), 179-  
364 183.
- 365 Lin, F. R., Ferrucci, L., Metter, E. J., An, Y., Zonderman, A. B., & Resnick, S. M. (2011). Hearing  
366 loss and cognition in the Baltimore Longitudinal Study of Aging. *Neuropsychology*, 25(6),  
367 763.
- 368 Lin, F. R., Metter, E. J., O'Brien, R. J., Resnick, S. M., Zonderman, A. B., & Ferrucci, L. (2011).  
369 Hearing loss and incident dementia. *Archives of Neurology*, 68(2), 214-220.
- 370 Lin, F. R., Thorpe, R., Gordon-Salant, S., & Ferrucci, L. (2011). Hearing loss prevalence and  
371 risk factors among older adults in the United States. *The Journals of Gerontology Series*  
372 *A: Biological Sciences and Medical Sciences*, 66(5), 582-590.

- 373 Lin, F. R., Yaffe, K., Xia, J., Xue, Q.-L., Harris, T. B., Purchase-Helzner, E., . . . Simonsick, E. M.  
374 (2013). Hearing loss and cognitive decline in older adults. *JAMA internal medicine*,  
375 173(4), 293-299.
- 376 Malgrange, B., Varela-Nieto, I., de Medina, P., & Paillasse, M. R. (2015). Targeting cholesterol  
377 homeostasis to fight hearing loss: a new perspective. *Frontiers in aging neuroscience*, 7,  
378 3.
- 379 Nadhimi, Y., & Llano, D. A. (2020). Does hearing loss lead to dementia? A review of the  
380 literature. *Hearing research*, 108038.
- 381 Nash, S. D., Cruickshanks, K. J., Klein, R., Klein, B. E., Nieto, F. J., Huang, G. H., . . . Tweed, T.  
382 S. (2011). The prevalence of hearing impairment and associated risk factors: the Beaver  
383 Dam Offspring Study. *Archives of Otolaryngology—Head & Neck Surgery*, 137(5), 432-  
384 439.
- 385 Ortman, J. M., Velkoff, V. A., & Hogan, H. (2014). *An aging nation: the older population in the*  
386 *United States*: United States Census Bureau, Economics and Statistics Administration,  
387 US . . .
- 388 Panza, F., Solfrizzi, V., & Logroscino, G. (2015). Age-related hearing impairment—a risk factor  
389 and frailty marker for dementia and AD. *Nature Reviews Neurology*, 11(3), 166.
- 390 Paoletti, L., Elena, C., Domizi, P., & Banchio, C. (2011). Role of phosphatidylcholine during  
391 neuronal differentiation. *IUBMB life*, 63(9), 714-720.
- 392 Patrick, R. P. (2019). Role of phosphatidylcholine-DHA in preventing APOE4-associated  
393 Alzheimer's disease. *The FASEB Journal*, 33(2), 1554-1564.
- 394 Rapoport, S. I., Chang, M. C., & Spector, A. A. (2001). Delivery and turnover of plasma-derived  
395 essential PUFAs in mammalian brain. *Journal of lipid research*, 42(5), 678-685.
- 396 Sanchez-Mejia, R. O., & Mucke, L. (2010). Phospholipase A2 and arachidonic acid in  
397 Alzheimer's disease. *Biochim Biophys Acta*, 1801(8), 784-790.  
398 doi:10.1016/j.bbaliip.2010.05.013
- 399 Seidman, M. D., Khan, M. J., Tang, W. X., & Quirk, W. S. (2002). Influence of lecithin on  
400 mitochondrial DNA and age-related hearing loss. *Otolaryngology—Head and Neck*  
401 *Surgery*, 127(3), 138-144.
- 402 Su, L.-J., Zhang, J.-H., Gomez, H., Murugan, R., Hong, X., Xu, D., . . . Peng, Z.-Y. (2019).  
403 Reactive oxygen species-induced lipid peroxidation in apoptosis, autophagy, and  
404 ferroptosis. *Oxidative medicine and cellular longevity*, 2019.
- 405 Thomson, R. S., Auduong, P., Miller, A. T., & Gurgel, R. K. (2017). Hearing loss as a risk factor  
406 for dementia: a systematic review. *Laryngoscope investigative otolaryngology*, 2(2), 69-  
407 79.
- 408 Wang, X., Wang, W., Li, L., Perry, G., Lee, H.-g., & Zhu, X. (2014). Oxidative stress and  
409 mitochondrial dysfunction in Alzheimer's disease. *Biochimica et Biophysica Acta (BBA)-*  
410 *Molecular Basis of Disease*, 1842(8), 1240-1247.
- 411 Whiley, L., Sen, A., Heaton, J., Proitsi, P., García-Gómez, D., Leung, R., . . . Mecocci, P.  
412 (2014). Evidence of altered phosphatidylcholine metabolism in Alzheimer's disease.  
413 *Neurobiology of aging*, 35(2), 271-278.
- 414 Xu, W., Zhang, C., Li, J.-Q., Tan, C.-C., Cao, X.-P., Tan, L., . . . Initiative, A. s. D. N. (2019).  
415 Age-related hearing loss accelerates cerebrospinal fluid tau levels and brain atrophy: a  
416 longitudinal study. *Aging (Albany NY)*, 11(10), 3156.
- 417 Zamroziewicz, M. K., Zwilling, C. E., & Barbey, A. K. (2016). Inferior prefrontal cortex mediates  
418 the relationship between phosphatidylcholine and executive functions in healthy, older  
419 adults. *Frontiers in aging neuroscience*, 8, 226.

420

421



422 Supplemental Table 1: Listing of lipids in all empirically-derived sets from Barupal et al. 2019

| Lip id Set | Lipid Class             | Lipid ID      | Network Label | FullName    | AcylChainInformation   | Adduct                | RT        | MZ           |
|------------|-------------------------|---------------|---------------|-------------|------------------------|-----------------------|-----------|--------------|
| Set -1     | Triacylglycerol         | UCD.Lipid.173 | TG 42:0       | TG (42:0)   | TG (14:0_14:0_14:0)    | [M+N H4] <sup>+</sup> | 9.4<br>3  | 740.6<br>763 |
| Set -1     | Triacylglycerol         | UCD.Lipid.174 | TG 40:0       | TG (40:0)   | TG(12:0_12:0_16:0)     | [M+N H4] <sup>+</sup> | 9.1       | 712.6<br>419 |
| Set -1     | Triacylglycerol         | UCD.Lipid.177 | TG 42:2       | TG (42:2)   | TG(12:0_12:0_18:2)     | [M+N H4] <sup>+</sup> | 8.4<br>67 | 736.6<br>446 |
| Set -1     | Triacylglycerol         | UCD.Lipid.179 | TG 44:0       | TG (44:0)   | TG(14:0_14:0_16:0)     | [M+N H4] <sup>+</sup> | 10.<br>13 | 768.7<br>037 |
| Set -1     | Triacylglycerol         | UCD.Lipid.180 | TG 44:1       | TG (44:1)   | TG(12:0_14:0_18:1)     | [M+N H4] <sup>+</sup> | 9.4<br>55 | 766.6<br>919 |
| Set -1     | Triacylglycerol         | UCD.Lipid.181 | TG 44:2       | TG (44:2)   |                        | [M+Na] <sup>+</sup>   | 9.0<br>33 | 769.6<br>316 |
| Set -1     | Triacylglycerol         | UCD.Lipid.182 | TG 46:0       | TG (46:0)   | TG(14:0_16:0_16:0)     | [M+N H4] <sup>+</sup> | 10.<br>38 | 796.7<br>389 |
| Set -1     | Triacylglycerol         | UCD.Lipid.183 | TG 46:1       | TG (46:1)   | TG(12:0_16:0_18:1)     | [M+N H4] <sup>+</sup> | 9.9<br>44 | 794.7<br>232 |
| Set -1     | Triacylglycerol         | UCD.Lipid.184 | TG 46:2       | TG (46:2)   | TG(12:0_16:1_18:1)     | [M+Na] <sup>+</sup>   | 9.5<br>12 | 797.6<br>63  |
| Set -1     | Triacylglycerol         | UCD.Lipid.185 | TG 46:3       | TG (46:3)   | TG(12:0_16:1_18:2)     | [M+Na] <sup>+</sup>   | 9.0<br>65 | 795.6<br>473 |
| Set -1     | Triacylglycerol         | UCD.Lipid.186 | TG 46:4<br>A  | TG (46:4) A |                        | [M+Na] <sup>+</sup>   | 8.8       | 793.6<br>322 |
| Set -1     | Triacylglycerol         | UCD.Lipid.187 | TG 48:0       | TG (48:0)   | TG(16:0_16:0_16:0)     | [M+N H4] <sup>+</sup> | 10.<br>81 | 824.7<br>702 |
| Set -1     | Triacylglycerol         | UCD.Lipid.188 | TG 48:1       | TG (48:1)   | TG(14:0_16:0_18:1)     | [M+N H4] <sup>+</sup> | 10.<br>4  | 822.7<br>545 |
| Set -1     | Triacylglycerol         | UCD.Lipid.189 | TG 48:2       | TG (48:2)   | TG(14:0_16:0_18:2)     | [M+N H4] <sup>+</sup> | 9.9<br>93 | 820.7<br>389 |
| Set -1     | Triacylglycerol         | UCD.Lipid.192 | TG 49:0       | TG (49:0)   | TG(16:0_16:0_17:0)     | [M+N H4] <sup>+</sup> | 10.<br>94 | 838.7<br>858 |
| Set -1     | Triacylglycerol         | UCD.Lipid.193 | TG 49:1       | TG (49:1)   | TG(15:0_16:0_18:1)     | [M+N H4] <sup>+</sup> | 10.<br>6  | 836.7<br>702 |
| Set -1     | Triacylglycerol         | UCD.Lipid.194 | TG 49:2       | TG (49:2)   | TG(15:0_16:0_18:2)     | [M+N H4] <sup>+</sup> | 10.<br>18 | 834.7<br>545 |
| Set -1     | Triacylglycerol         | UCD.Lipid.196 | TG 50:0       | TG (50:0)   | TG(16:0_16:0_18:0)     | [M+N H4] <sup>+</sup> | 11.<br>21 | 852.8<br>015 |
| Set -1     | Triacylglycerol         | UCD.Lipid.197 | TG 50:1       | TG (50:1)   | TG(16:0_16:0_18:1)     | [M+N H4] <sup>+</sup> | 10.<br>82 | 850.7<br>858 |
| Set -1     | Triacylglycerol         | UCD.Lipid.198 | TG 50:2       | TG (50:2)   | TG(16:0_16:1_18:1)     | [M+N H4] <sup>+</sup> | 10.<br>42 | 848.7<br>702 |
| Set -1     | Triacylglycerol         | UCD.Lipid.202 | TG 50:6       | TG (50:6)   | TG(14:0_16:1_20:5)     | [M+Na] <sup>+</sup>   | 9.1<br>8  | 845.6<br>599 |
| Set -1     | Triacylglycerol         | UCD.Lipid.203 | TG 51:1       | TG (51:1)   | TG(16:0_17:0_18:1)     | [M+N H4] <sup>+</sup> | 10.<br>96 | 864.8<br>015 |
| Set -1     | Triacylglycerol         | UCD.Lipid.208 | TG 52:0       | TG (52:0)   | TG(16:0_18:0_18:0)     | [M+N H4] <sup>+</sup> | 11.<br>58 | 880.8<br>328 |
| Set -1     | Triacylglycerol         | UCD.Lipid.209 | TG 52:1       | TG (52:1)   | TG(16:0_18:0_18:1)     | [M+N H4] <sup>+</sup> | 11.<br>22 | 878.8<br>171 |
| Set -1     | Triacylglycerol         | UCD.Lipid.215 | TG 53:1       | TG (53:1)   | TG(17:0_18:0_18:1)     | [M+N H4] <sup>+</sup> | 11.<br>35 | 892.8<br>328 |
| Set -1     | Triacylglycerol         | UCD.Lipid.220 | TG 54:0       | TG (54:0)   | TG(18:0_18:0_18:0)     | [M+N H4] <sup>+</sup> | 11.<br>92 | 908.8<br>576 |
| Set -1     | Triacylglycerol         | UCD.Lipid.221 | TG 54:1       | TG (54:1)   | TG(18:0_18:0_18:1)     | [M+N H4] <sup>+</sup> | 11.<br>58 | 906.8<br>484 |
| Set -1     | Triacylglycerol         | UCD.Lipid.229 | TG 56:2       | TG (56:2)   | TG(18:1_18:1_20:0)     | [M+N H4] <sup>+</sup> | 11.<br>58 | 932.8<br>641 |
| Set -2     | Cholesteroyl ester      | UCD.Lipid.10  | CE 16:1       | CE (16:1)   | 16:1 Cholesteryl ester | [M+Na] <sup>+</sup>   | 10.<br>33 | 645.5<br>581 |
| Set -2     | Lysophosphatidylcholine | UCD.Lipid.119 | LPC 14:0      | LPC (14:0)  | LysoPC 14:0            | [M+H] <sup>+</sup>    | 0.9<br>81 | 468.3<br>089 |
| Set -2     | Phosphatidylcholine     | UCD.Lipid.133 | PC 28:0       | PC (28:0)   |                        | [M+H] <sup>+</sup>    | 4.2<br>39 | 678.5<br>065 |

|        |                           |                |           |                  |                     |               |           |              |
|--------|---------------------------|----------------|-----------|------------------|---------------------|---------------|-----------|--------------|
| Set -2 | Phosphatidylcholine       | UCD.Lipi d.134 | PC 30:0   | PC (30:0)        | PC(14:0_16:0)       | [M+H]<br>+    | 4.8<br>11 | 706.5<br>378 |
| Set -2 | Phosphatidylcholine       | UCD.Lipi d.135 | PC 30:1   | PC (30:1)        |                     | [M+H]<br>+    | 4.3<br>22 | 704.5<br>225 |
| Set -2 | Phosphatidylcholine       | UCD.Lipi d.136 | PC 31:0   | PC (31:0)        |                     | [M+H]<br>+    | 5.1<br>1  | 720.5<br>538 |
| Set -2 | Phosphatidylcholine       | UCD.Lipi d.137 | PC 31:1   | PC (31:1)        |                     | [M+H]<br>+    | 4.8<br>2  | 718.5<br>345 |
| Set -2 | Phosphatidylcholine       | UCD.Lipi d.138 | PC 32:3   | PC (32:3)        |                     | [M+H]<br>+    | 4.8<br>11 | 728.5<br>222 |
| Set -2 | Phosphatidylcholine       | UCD.Lipi d.139 | PC 33:0   | PC (33:0)        |                     | [M+H]<br>+    | 5.6<br>4  | 748.5<br>851 |
| Set -2 | Phosphatidylcholine       | UCD.Lipi d.383 | PC 32:1   | PC (32:1)        | PC(16:0_16:1)       | [M+Ac<br>-H]- | 5.0<br>33 | 790.5<br>6   |
| Set -2 | Phosphatidylcholine       | UCD.Lipi d.384 | PC 32:2   | PC (32:2)        | PC(14:0_18:2)       | [M+Ac<br>-H]- | 4.5<br>67 | 788.5<br>4   |
| Set -2 | Phosphatidylcholine       | UCD.Lipi d.385 | PC 33:1   | PC (33:1)        | PC(15:0_18:1)       | [M+Ac<br>-H]- | 5.3<br>4  | 804.5<br>8   |
| Set -2 | Phosphatidylcholine       | UCD.Lipi d.388 | PC 34:1   | PC (34:1)        | PC(16:0_18:1)       | [M+Ac<br>-H]- | 5.6<br>48 | 818.5<br>9   |
| Set -2 | Phosphatidylcholine       | UCD.Lipi d.390 | PC 34:3   | PC (34:3)        | PC(16:0_18:3)       | [M+Ac<br>-H]- | 4.7<br>5  | 814.5<br>6   |
| Set -2 | Phosphatidylcholine       | UCD.Lipi d.391 | PC 34:4   | PC (34:4)        | PC(14:0_20:4)       | [M+Ac<br>-H]- | 4.4<br>92 | 812.5<br>4   |
| Set -2 | Phosphatidylcholine       | UCD.Lipi d.392 | PC 35:1   | PC (35:1)        | PC(17:0_18:1)       | [M+Ac<br>-H]- | 5.9<br>73 | 832.6<br>1   |
| Set -2 | Phosphatidylcholine       | UCD.Lipi d.395 | PC 36:1   | PC (36:1)        | PC(18:0_18:1)       | [M+Ac<br>-H]- | 6.3<br>14 | 846.6<br>2   |
| Set -2 | Phosphatidylethanol amine | UCD.Lipi d.431 | PE 36:1   | PE (36:1)        | PE(18:0_18:1)       | [M-<br>H]-    | 5.6<br>48 | 744.5<br>5   |
| Set -2 | Phosphatidylethanol amine | UCD.Lipi d.437 | PE 40:6   | PE (40:6)        | PE(18:0_22:6)       | [M-<br>H]-    | 4.9<br>08 | 790.5<br>4   |
| Set -2 | Phosphatidylinositol      | UCD.Lipi d.452 | PI 32:1   | PI (32:1)        | PI(16:0_16:1)       | [M-<br>H]-    | 4.0<br>25 | 807.5        |
| Set -2 | Phosphatidylinositol      | UCD.Lipi d.458 | PI 36:4   | PI (36:4)        | PI(16:0_20:4)       | [M-<br>H]-    | 4.0<br>92 | 857.5<br>2   |
| Set -3 | Sphingomyelin             | UCD.Lipi d.169 | SM d30:1  | SM (d30:1)       | SM (d18:1_12:0)     | [M+H]<br>+    | 3.6<br>34 | 647.5<br>123 |
| Set -3 | Ceramide                  | UCD.Lipi d.257 | Cer d32:1 | Ceramide (d32:1) | Cer[NS](d16:1_16:0) | [M+Ac<br>-H]- | 5.0<br>91 | 568.4<br>9   |
| Set -3 | Ceramide                  | UCD.Lipi d.258 | Cer d33:1 | Ceramide (d33:1) | Cer[NS](d17:1_16:0) | [M+Cl]<br>-   | 5.4<br>15 | 558.4<br>7   |
| Set -3 | Ceramide                  | UCD.Lipi d.260 | Cer d34:1 | Ceramide (d34:1) | Cer[NS](d18:1_16:0) | [M+Ac<br>-H]- | 5.7<br>48 | 596.5<br>3   |
| Set -3 | Ceramide                  | UCD.Lipi d.261 | Cer d34:2 | Ceramide (d34:2) |                     | [M+Ac<br>-H]- | 5.1<br>82 | 594.5<br>1   |
| Set -3 | Ceramide                  | UCD.Lipi d.262 | Cer d36:1 | Ceramide (d36:1) | Cer[NS](d18:1_18:0) | [M+Cl]<br>-   | 6.4<br>55 | 600.5<br>1   |
| Set -3 | Ceramide                  | UCD.Lipi d.272 | Cer d43:1 | Ceramide (d43:1) | Cer[NS](d19:1_24:0) | [M+Cl]<br>-   | 8.6<br>82 | 698.6<br>2   |
| Set -3 | Sphingomyelin             | UCD.Lipi d.463 | SM d32:0  | SM (d32:0)       |                     | [M+Ac<br>-H]- | 4.4<br>67 | 735.5<br>6   |
| Set -3 | Sphingomyelin             | UCD.Lipi d.464 | SM d32:1  | SM (d32:1)       | SM(d18:1_14:0)      | [M+Ac<br>-H]- | 4.2<br>67 | 733.5<br>5   |
| Set -3 | Sphingomyelin             | UCD.Lipi d.465 | SM d32:2  | SM (d32:2)       |                     | [M+Ac<br>-H]- | 3.8<br>18 | 731.5<br>3   |
| Set -3 | Sphingomyelin             | UCD.Lipi d.466 | SM d33:1  | SM (d33:1)       | SM(d17:1_16:0)      | [M+Ac<br>-H]- | 4.5<br>58 | 747.5<br>7   |
| Set -3 | Sphingomyelin             | UCD.Lipi d.469 | SM d36:0  | SM (d36:0)       |                     | [M+Ac<br>-H]- | 5.7<br>65 | 791.6<br>3   |
| Set -3 | Sphingomyelin             | UCD.Lipi d.470 | SM d36:1  | SM (d36:1)       | SM(d18:1_18:0)      | [M+Ac<br>-H]- | 5.5<br>23 | 789.6<br>1   |
| Set -3 | Sphingomyelin             | UCD.Lipi d.473 | SM d37:1  | SM (d37:1)       |                     | [M+Ac<br>-H]- | 5.8<br>73 | 803.6<br>3   |
| Set -3 | Sphingomyelin             | UCD.Lipi d.474 | SM d38:0  | SM (d38:0)       | SM(d18:0_20:0)      | [M+Ac<br>-H]- | 6.4<br>55 | 819.6<br>6   |
| Set -3 | Sphingomyelin             | UCD.Lipi d.475 | SM d38:1  | SM (d38:1)       | SM(d18:1_20:0)      | [M+Ac<br>-H]- | 6.2<br>14 | 817.6<br>4   |

|        |                              |               |              |                            |                             |               |           |              |
|--------|------------------------------|---------------|--------------|----------------------------|-----------------------------|---------------|-----------|--------------|
| Set -3 | Sphingomyelin                | UCD.Lipid.477 | SM d39:1     | SM (d39:1)                 | SM(d16:1_23:0)              | [M+Ac-H]-     | 6.5<br>55 | 831.6<br>6   |
| Set -3 | Sphingomyelin                | UCD.Lipid.490 | SM d43:1     | SM (d43:1)                 |                             | [M+Ac-H]-     | 7.7<br>7  | 887.7<br>2   |
| Set -3 | Sphingomyelin                | UCD.Lipid.491 | SM d43:2     | SM (d43:2)                 |                             | [M+Ac-H]-     | 7.0<br>79 | 885.7<br>1   |
| Set -4 | Lysophosphatidylcholine      | UCD.Lipid.126 | LPC 20:5     | LPC (20:5)                 | LysoPC 20:5                 | [M+H]<br>+    | 0.9<br>64 | 542.3<br>239 |
| Set -4 | Lysophosphatidylcholine      | UCD.Lipid.128 | LPC 22:6     | LPC (22:6)                 | LysoPC 22:6                 | [M+H]<br>+    | 1.1<br>55 | 568.3<br>404 |
| Set -4 | Phosphatidylcholine          | UCD.Lipid.143 | PC 36:6      | PC (36:6)                  |                             | [M+H]<br>+    | 4.2<br>31 | 778.5<br>378 |
| Set -4 | Phosphatidylcholine          | UCD.Lipid.145 | PC 37:6      | PC (37:6)                  |                             | [M+H]<br>+    | 4.4<br>96 | 792.5<br>538 |
| Set -4 | Phosphatidylcholine          | UCD.Lipid.148 | PC 38:6<br>A | PC (38:6) A                | PC(16:0_22:6)               | [M+H]<br>+    | 4.7<br>78 | 806.5<br>691 |
| Set -4 | Phosphatidylcholine          | UCD.Lipid.149 | PC 38:7      | PC (38:7)                  |                             | [M+H]<br>+    | 4.3<br>14 | 804.5<br>538 |
| Set -4 | Phosphatidylcholine          | UCD.Lipid.150 | PC 39:6      | PC (39:6)                  |                             | [M+H]<br>+    | 5.0<br>27 | 820.5<br>851 |
| Set -4 | Cholesteroyl ester           | UCD.Lipid.16  | CE 20:5      | CE (20:5)                  | 20:5 Cholesteryl ester      | [M+Na]<br>+   | 9.7<br>11 | 693.5<br>581 |
| Set -4 | Cholesteroyl ester           | UCD.Lipid.17  | CE 22:6      | CE (22:6)                  | 22:6 Cholesteryl ester      | [M+Na]<br>+   | 9.8<br>94 | 719.5<br>738 |
| Set -4 | Lysophosphatidylethanolamine | UCD.Lipid.381 | LPE 22:6     | LPE (22:6)                 | LysoPC 22:6                 | [M-H]-        | 1.2<br>63 | 524.2<br>8   |
| Set -4 | Phosphatidylcholine          | UCD.Lipid.399 | PC 36:5<br>B | PC (36:5) B                | PC(16:1_20:4)               | [M+Ac-H]-     | 4.6<br>83 | 838.5<br>6   |
| Set -4 | Phosphatidylcholine          | UCD.Lipid.406 | PC 38:6      | PC (38:6)                  | PC(18:1_20:5)_PC(18:2_20:4) | [M+Ac-H]-     | 4.9<br>08 | 864.5<br>8   |
| Set -4 | Phosphatidylcholine          | UCD.Lipid.409 | PC 40:6<br>B | PC (40:6) B                | PC(18:0_22:6)               | [M+Ac-H]-     | 5.5<br>32 | 892.6<br>1   |
| Set -4 | Phosphatidylcholine          | UCD.Lipid.410 | PC 40:7      | PC (40:7)                  | PC(18:1_22:6)               | [M+Ac-H]-     | 4.9<br>83 | 890.5<br>9   |
| Set -4 | Phosphatidylethanolamine     | UCD.Lipid.442 | PE p-36:5    | PE (p-36:5) or PE (o-36:6) | PE(P-16:0_20:5)             | [M-H]-        | 5.0<br>99 | 720.5        |
| Set -4 | Phosphatidylinositol         | UCD.Lipid.462 | PI 40:6      | PI (40:6)                  | PI(18:0_22:6)               | [M-H]-        | 4.5<br>08 | 909.5<br>5   |
| Set -4 | Fatty acid                   | UCD.Lipid.513 | FA 20:5      | FA (20:5)                  | FA (20:5)                   | [M-H]-        | 1.5<br>3  | 301.2<br>2   |
| Set -4 | Fatty acid                   | UCD.Lipid.517 | FA 22:6      | FA (22:6)                  | FA (22:6)                   | [M-H]-        | 1.7<br>2  | 327.2<br>3   |
| Set -5 | Diacylglycerol               | UCD.Lipid.104 | DG 32:1      | DG (32:1)                  | DG(16:0_16:1)               | [M+Na]<br>+   | 6.1<br>43 | 589.4<br>812 |
| Set -5 | Diacylglycerol               | UCD.Lipid.105 | DG 34:1      | DG (34:1)                  | DG(16:0_18:1)               | [M+Na]<br>+   | 6.8<br>92 | 617.5<br>116 |
| Set -5 | Diacylglycerol               | UCD.Lipid.106 | DG 34:2      | DG (34:2)                  | DG(16:0_18:2)               | [M+Na]<br>+   | 6.2<br>7  | 615.4<br>965 |
| Set -5 | Diacylglycerol               | UCD.Lipid.107 | DG 34:3      | DG (34:3)                  | DG(16:1_18:2)               | [M+N H4]<br>+ | 5.6<br>86 | 608.5<br>246 |
| Set -5 | Diacylglycerol               | UCD.Lipid.109 | DG 36:2      | DG (36:2)                  | DG(18:1_18:1)               | [M+N H4]<br>+ | 6.9<br>5  | 638.5<br>718 |
| Set -5 | Diacylglycerol               | UCD.Lipid.110 | DG 36:3      | DG (36:3)                  | DG(18:1_18:2)               | [M+N H4]<br>+ | 6.4<br>2  | 636.5<br>562 |
| Set -5 | Triacylglycerol              | UCD.Lipid.190 | TG 48:3      | TG (48:3)                  | TG(12:0_18:1_18:2)          | [M+Na]<br>+   | 9.5<br>46 | 823.6<br>789 |
| Set -5 | Triacylglycerol              | UCD.Lipid.191 | TG 48:4      | TG (48:4)                  | TG(12:0_18:2_18:2)          | [M+Na]<br>+   | 9.3<br>4  | 821.6<br>597 |
| Set -5 | Triacylglycerol              | UCD.Lipid.195 | TG 49:3      | TG (49:3)                  | TG(15:0_16:1_18:2)          | [M+N H4]<br>+ | 9.7<br>94 | 832.7<br>389 |
| Set -5 | Triacylglycerol              | UCD.Lipid.199 | TG 50:3      | TG (50:3)                  | TG(16:1_16:1_18:1)          | [M+N H4]<br>+ | 10.<br>02 | 846.7<br>545 |
| Set -5 | Triacylglycerol              | UCD.Lipid.200 | TG 50:4      | TG (50:4)                  | TG(16:1_16:1_18:2)          | [M+Na]<br>+   | 9.6<br>29 | 849.6<br>943 |
| Set -5 | Triacylglycerol              | UCD.Lipid.201 | TG 50:5      | TG (50:5)                  | TG(14:0_18:2_18:3)          | [M+Na]<br>+   | 9.2<br>4  | 847.6<br>786 |
| Set -5 | Triacylglycerol              | UCD.Lipid.204 | TG 51:2      | TG (51:2)                  | TG(16:0_17:0_18:2)          | [M+N H4]<br>+ | 10.<br>62 | 862.7<br>858 |

|        |                          |                |                  |                              |                      |                        |       |          |
|--------|--------------------------|----------------|------------------|------------------------------|----------------------|------------------------|-------|----------|
| Set -5 | Triacylglycerol          | UCD.Lipi d.205 | TG 51:3          | TG (51:3)                    | TG(15:0_18:1_18:2)   | [M+N H4] <sup>+</sup>  | 10.25 | 860.7702 |
| Set -5 | Triacylglycerol          | UCD.Lipi d.210 | TG 52:2          | TG (52:2)                    | TG(16:0_18:1_18:1)   | [M+N H4] <sup>+</sup>  | 10.83 | 876.8015 |
| Set -5 | Triacylglycerol          | UCD.Lipi d.211 | TG 52:3          | TG (52:3)                    | TG(16:0_18:1_18:2)   | [M+N H4] <sup>+</sup>  | 10.47 | 874.7858 |
| Set -5 | Triacylglycerol          | UCD.Lipi d.216 | TG 53:2          | TG (53:2)                    | TG(17:0_18:1_18:1)   | [M+N H4] <sup>+</sup>  | 11.01 | 890.8171 |
| Set -5 | Triacylglycerol          | UCD.Lipi d.217 | TG 53:3          | TG (53:3)                    | TG(17:0_18:1_18:2)   | [M+N H4] <sup>+</sup>  | 10.65 | 888.8015 |
| Set -6 | Diacylglycerol           | UCD.Lipi d.108 | DG 36:1          | DG (36:1)                    | DG(18:0_18:1)        | [M+N H4] <sup>+</sup>  | 7.47  | 640.588  |
| Set -6 | Diacylglycerol           | UCD.Lipi d.113 | DG 38:0          | DG (38:0)                    |                      | [M+N H4] <sup>+</sup>  | 7.94  | 670.6086 |
| Set -6 | Diacylglycerol           | UCD.Lipi d.114 | DG 38:3          | DG (38:3)                    | DG(20:1_18:2)        | [M+Na] <sup>+</sup>    | 6.974 | 669.5653 |
| Set -6 | Diacylglycerol           | UCD.Lipi d.116 | DG 38:6          | DG (38:6)                    | DG(18:2_20:4)        | [M+Na] <sup>+</sup>    | 5.732 | 663.4959 |
| Set -6 | Lysophosphatidylcholine  | UCD.Lipi d.127 | LPC 22:4         | LPC (22:4)                   | LysoPC 22:4          | [M+H] <sup>+</sup>     | 1.661 | 572.3711 |
| Set -6 | Lysophosphatidylcholine  | UCD.Lipi d.129 | LPC o-16:0       | LPC (o-16:0)                 | LPC (o-16:0)         | [M+H] <sup>+</sup>     | 1.752 | 482.3606 |
| Set -6 | Lysophosphatidylcholine  | UCD.Lipi d.130 | LPC p-16:0       | LPC (p-16:0) or LPC (o-16:1) | LPC (o-16:1)         | [M+H] <sup>+</sup>     | 1.694 | 480.3448 |
| Set -6 | Lysophosphatidylcholine  | UCD.Lipi d.131 | LPC p-18:0       | LPC (p-18:0) or LPC (o-18:1) | LPC (o-18:1)         | [M+H] <sup>+</sup>     | 1.909 | 508.3762 |
| Set -6 | Triacylglycerol          | UCD.Lipi d.175 | TG 40:1          | TG (40:1)                    |                      | [M+N H4] <sup>+</sup>  | 8.384 | 710.6298 |
| Set -6 | Triacylglycerol          | UCD.Lipi d.178 | TG 42:3          | TG (42:3)                    |                      | [M+N H4] <sup>+</sup>  | 8.24  | 734.6265 |
| Set -6 | Ceramide                 | UCD.Lipi d.19  | Cer d42:2        | Ceramide (d42:2)             | Cer[NS](d18:2_24:0)  | [M+H] <sup>+</sup>     | 7.615 | 648.6289 |
| Set -6 | Triacylglycerol          | UCD.Lipi d.253 | TG 60:6          | TG (60:6)                    |                      | [M+Na] <sup>+</sup>    | 11.27 | 985.8105 |
| Set -6 | Ceramide                 | UCD.Lipi d.259 | Cer d34:0        | Ceramide (d34:0)             | Cer[NDS](d18:0_16:0) | [M+Ac -H] <sup>-</sup> | 5.998 | 598.54   |
| Set -6 | Phosphatidylethanolamine | UCD.Lipi d.439 | PE p-36:1        | PE (p-36:1) or PE (o-36:2)   | PE(P-18:0_18:1)      | [M-H] <sup>-</sup>     | 6.838 | 728.56   |
| Set -6 | Fatty acid               | UCD.Lipi d.511 | FA 20:3          | FA (20:3)                    | FA (20:3)            | [M-H] <sup>-</sup>     | 2.5   | 305.25   |
| Set -6 | Fatty acid               | UCD.Lipi d.512 | FA 20:4          | FA (20:4)                    | FA (20:4)            | [M-H] <sup>-</sup>     | 1.93  | 303.23   |
| Set -6 | Fatty acid               | UCD.Lipi d.515 | FA 22:1          | FA (22:1)                    | FA (22:1)            | [M-H] <sup>-</sup>     | 3.9   | 337.31   |
| Set -6 | Acylcarnitine            | UCD.Lipi d.9   | AC C18:3         | Acylcarnitine C18:3          | Acylcarnitine 18:3   | [M+H] <sup>+</sup>     | 1.13  | 422.3265 |
| Set -7 | Phosphatidylcholine      | UCD.Lipi d.142 | PC 36:4 A        | PC (36:4) A                  | PC(18:2_18:2)        | [M+H] <sup>+</sup>     | 4.637 | 782.5694 |
| Set -7 | Glucosylceramide         | UCD.Lipi d.368 | GlcCer d24:1-2OH | GlcCer(d14:1(4E)/20:0(2OH))  |                      | [M+Cl] <sup>-</sup>    | 4.966 | 750.53   |
| Set -7 | Phosphatidylcholine      | UCD.Lipi d.382 | PC 32:0          | PC (32:0)                    | PC(16:0_16:0)        | [M+Ac -H] <sup>-</sup> | 5.573 | 792.58   |
| Set -7 | Phosphatidylcholine      | UCD.Lipi d.386 | PC 33:2          | PC (33:2)                    | PC(16:0_18:2)        | [M+Ac -H] <sup>-</sup> | 4.858 | 802.56   |
| Set -7 | Phosphatidylcholine      | UCD.Lipi d.387 | PC 34:0          | PC (34:0)                    | PC(16:0_18:0)        | [M+Ac -H] <sup>-</sup> | 6.239 | 820.61   |
| Set -7 | Phosphatidylcholine      | UCD.Lipi d.389 | PC 34:2          | PC (34:2)                    | PC(16:0_18:2)        | [M+Ac -H] <sup>-</sup> | 5.166 | 816.58   |
| Set -7 | Phosphatidylcholine      | UCD.Lipi d.393 | PC 35:2          | PC (35:2)                    | PC(17:0_18:2)        | [M+Ac -H] <sup>-</sup> | 5.48  | 830.59   |
| Set -7 | Phosphatidylcholine      | UCD.Lipi d.396 | PC 36:2          | PC (36:2)                    | PC(18:0_18:2)        | [M+Ac -H] <sup>-</sup> | 5.806 | 844.61   |
| Set -7 | Phosphatidylcholine      | UCD.Lipi d.400 | PC 37:2          | PC (37:2)                    | PC(19:0_18:2)        | [M+Ac -H] <sup>-</sup> | 6.14  | 858.62   |
| Set -7 | Phosphatidylethanolamine | UCD.Lipi d.434 | PE 38:2          | PE (38:2)                    | PE(20:0_18:2)        | [M-H] <sup>-</sup>     | 5.806 | 770.57   |
| Set -7 | Phosphatidylethanolamine | UCD.Lipi d.443 | PE p-38:2        | PE (p-38:2) or PE (o-38:3)   |                      | [M-H] <sup>-</sup>     | 6.98  | 754.58   |

|        |                              |               |             |                            |                    |                       |           |              |
|--------|------------------------------|---------------|-------------|----------------------------|--------------------|-----------------------|-----------|--------------|
| Set -7 | Phosphatidylethanolamine     | UCD.Lipid.448 | PE p-40:4   | PE (p-40:4) or PE (o-40:5) | PE(P-20:0_20:4)    | [M-H] <sup>-</sup>    | 6.8<br>7  | 778.5<br>8   |
| Set -7 | Phosphatidylinositol         | UCD.Lipid.453 | PI 34:1     | PI (34:1)                  | PI(16:0_18:1)      | [M-H] <sup>-</sup>    | 4.4<br>83 | 835.5<br>3   |
| Set -7 | Phosphatidylinositol         | UCD.Lipid.454 | PI 34:2     | PI (34:2)                  | PI(16:0_18:2)      | [M-H] <sup>-</sup>    | 4.1<br>58 | 833.5<br>2   |
| Set -7 | Phosphatidylinositol         | UCD.Lipid.455 | PI 36:1     | PI (36:1)                  | PI(18:0_18:1)      | [M-H] <sup>-</sup>    | 5.1<br>98 | 863.5<br>7   |
| Set -7 | Phosphatidylinositol         | UCD.Lipid.456 | PI 36:2     | PI (36:2)                  | PI(18:0_18:2)      | [M-H] <sup>-</sup>    | 4.7<br>32 | 861.5<br>5   |
| Set -7 | Phosphatidylinositol         | UCD.Lipid.457 | PI 36:3     | PI (36:3)                  | PI(16:0_20:3)      | [M-H] <sup>-</sup>    | 4.2<br>25 | 859.5<br>3   |
| Set -8 | Lysophosphatidylcholine      | UCD.Lipid.120 | LPC 15:0    | LPC (15:0)                 | LysoPC 15:0        | [M+H] <sup>+</sup>    | 1.2<br>06 | 482.3<br>241 |
| Set -8 | Lysophosphatidylcholine      | UCD.Lipid.121 | LPC 17:1    | LPC (17:1)                 | LysoPC 17:1        | [M+H] <sup>+</sup>    | 1.3<br>45 | 508.3<br>401 |
| Set -8 | Lysophosphatidylcholine      | UCD.Lipid.122 | LPC 18:0    | LPC (18:0)                 | LysoPC 18:0        | [M+H] <sup>+</sup>    | 2.2<br>58 | 524.3<br>708 |
| Set -8 | Lysophosphatidylcholine      | UCD.Lipid.123 | LPC 18:3    | LPC (18:3)                 | LysoPC 18:3        | [M+H] <sup>+</sup>    | 0.9<br>81 | 518.3<br>241 |
| Set -8 | Lysophosphatidylcholine      | UCD.Lipid.124 | LPC 20:0    | LPC (20:0)                 | LysoPC 20:0        | [M+H] <sup>+</sup>    | 3.0<br>62 | 552.4<br>021 |
| Set -8 | Lysophosphatidylcholine      | UCD.Lipid.369 | LPC 16:0    | LPC (16:0)                 | LysoPC 16:0        | [M+Ac-H] <sup>-</sup> | 1.5<br>63 | 554.3<br>5   |
| Set -8 | Lysophosphatidylcholine      | UCD.Lipid.370 | LPC 16:1    | LPC (16:1)                 | LysoPC 16:1        | [M+Ac-H] <sup>-</sup> | 1.1<br>8  | 552.3<br>3   |
| Set -8 | Lysophosphatidylcholine      | UCD.Lipid.371 | LPC 18:0 A  | LPC (18:0) A               | LysoPC 18:0        | [M+Ac-H] <sup>-</sup> | 2.1<br>45 | 582.3<br>8   |
| Set -8 | Lysophosphatidylcholine      | UCD.Lipid.372 | LPC 18:1    | LPC (18:1)                 | LysoPC 18:1        | [M+Ac-H] <sup>-</sup> | 1.7<br>13 | 580.3<br>6   |
| Set -8 | Lysophosphatidylcholine      | UCD.Lipid.373 | LPC 18:2    | LPC (18:2)                 | LysoPC 18:2        | [M+Ac-H] <sup>-</sup> | 1.3<br>13 | 578.3<br>5   |
| Set -8 | Lysophosphatidylcholine      | UCD.Lipid.374 | LPC 20:1    | LPC (20:1)                 | LysoPC 20:1        | [M+Ac-H] <sup>-</sup> | 2.4<br>7  | 608.3<br>9   |
| Set -8 | Lysophosphatidylcholine      | UCD.Lipid.375 | LPC 20:2    | LPC (20:2)                 | LysoPC 20:2        | [M+Ac-H] <sup>-</sup> | 1.8<br>96 | 606.3<br>8   |
| Set -8 | Lysophosphatidylcholine      | UCD.Lipid.376 | LPC 20:3    | LPC (20:3)                 | LysoPC 20:3        | [M+Ac-H] <sup>-</sup> | 1.5<br>05 | 604.3<br>6   |
| Set -8 | Lysophosphatidylcholine      | UCD.Lipid.377 | LPC 22:5    | LPC (22:5)                 | LysoPC 22:5        | [M+Ac-H] <sup>-</sup> | 1.3<br>88 | 628.3<br>6   |
| Set -8 | Lysophosphatidylethanolamine | UCD.Lipid.378 | LPE 16:0    | LPE (16:0)                 | LysoPE 16:0        | [M-H] <sup>-</sup>    | 1.5<br>96 | 452.2<br>8   |
| Set -8 | Lysophosphatidylethanolamine | UCD.Lipid.379 | LPE 18:2    | LPE (18:2)                 | LysoPE 18:2        | [M-H] <sup>-</sup>    | 1.3<br>47 | 476.2<br>8   |
| Set -9 | Phosphatidylcholine          | UCD.Lipid.132 | PC 27:0-CHO | PC (16:0/9:0(CHO))         | PC (16:0_9:0(CHO)) | [M+H] <sup>+</sup>    | 2.3<br>74 | 650.4<br>391 |
| Set -9 | Triacylglycerol              | UCD.Lipid.176 | TG 42:1     | TG (42:1)                  | TG(12:0_12:0_18:1) | [M+Na] <sup>+</sup>   | 8.9<br>67 | 743.6<br>162 |
| Set -9 | Fatty acid                   | UCD.Lipid.493 | FA 11:0     | FA (11:0)                  | FA (11:0)          | [M-H] <sup>-</sup>    | 0.8<br>2  | 185.1<br>5   |
| Set -9 | Fatty acid                   | UCD.Lipid.494 | FA 12:0     | FA (12:0)                  | FA (12:0)          | [M-H] <sup>-</sup>    | 1.0<br>6  | 199.1<br>7   |
| Set -9 | Fatty acid                   | UCD.Lipid.495 | FA 13:0     | FA (13:0)                  | FA (13:0)          | [M-H] <sup>-</sup>    | 1.3       | 213.1<br>9   |
| Set -9 | Fatty acid                   | UCD.Lipid.496 | FA 14:0     | FA (14:0)                  | FA (14:0)          | [M-H] <sup>-</sup>    | 1.6<br>3  | 227.2        |
| Set -9 | Fatty acid                   | UCD.Lipid.498 | FA 15:0     | FA (15:0)                  | FA (15:0)          | [M-H] <sup>-</sup>    | 2.0<br>2  | 241.2<br>2   |
| Set -9 | Fatty acid                   | UCD.Lipid.499 | FA 15:1     | FA (15:1)                  | FA (15:1)          | [M-H] <sup>-</sup>    | 1.5       | 239.2        |
| Set -9 | Fatty acid                   | UCD.Lipid.500 | FA 16:0     | FA (16:0)                  | FA (16:0)          | [M-H] <sup>-</sup>    | 2.4<br>7  | 255.2<br>3   |
| Set -9 | Fatty acid                   | UCD.Lipid.502 | FA 17:0     | FA (17:0)                  | FA (17:0)          | [M-H] <sup>-</sup>    | 2.9<br>6  | 269.2<br>5   |
| Set -9 | Fatty acid                   | UCD.Lipid.504 | FA 18:0     | FA (18:0)                  | FA (18:0)          | [M-H] <sup>-</sup>    | 3.2<br>6  | 283.2<br>6   |
| Set -9 | Fatty acid                   | UCD.Lipid.508 | FA 20:0     | FA (20:0)                  | FA (20:0)          | [M-H] <sup>-</sup>    | 3.8<br>5  | 311.3        |

|         |                      |                |              |                                                         |                        |           |       |          |
|---------|----------------------|----------------|--------------|---------------------------------------------------------|------------------------|-----------|-------|----------|
| Set -9  | Fatty acid           | UCD.Lipi d.514 | FA 22:0      | FA (22:0)                                               | FA (22:0)              | [M-H]-    | 4.5   | 339.33   |
| Set -9  | Fatty acid           | UCD.Lipi d.518 | FA 24:0      | FA (24:0)                                               | FA (24:0)              | [M-H]-    | 5.23  | 367.36   |
| Set -9  | Fatty acid           | UCD.Lipi d.520 | FA 26:0      | FA (26:0)                                               | FA (26:0)              | [M-H]-    | 6.02  | 395.39   |
| Set -9  | Fatty acid           | UCD.Lipi d.521 | FA 28:0      | FA (28:0)                                               | FA (28:0)              | [M-H]-    | 6.82  | 423.42   |
| Set -10 | Sphingomyelin        | UCD.Lipi d.171 | SM d40:2     | SM (d40:2)                                              |                        | [M+H]+    | 6.038 | 785.6531 |
| Set -10 | Phosphatidylinositol | UCD.Lipi d.461 | PI 38:5      | PI (38:5)                                               | PI(18:1_20:4)          | [M-H]-    | 4.142 | 883.53   |
| Set -10 | Sphingomyelin        | UCD.Lipi d.468 | SM d34:2     | SM (d34:2)                                              | SM(d18:2_16:0)         | [M+Ac-H]- | 4.359 | 759.57   |
| Set -10 | Sphingomyelin        | UCD.Lipi d.471 | SM d36:2     | SM (d36:2)                                              |                        | [M+Ac-H]- | 4.974 | 787.6    |
| Set -10 | Sphingomyelin        | UCD.Lipi d.472 | SM d36:3     | SM (d36:3)                                              |                        | [M+Ac-H]- | 4.508 | 785.58   |
| Set -10 | Sphingomyelin        | UCD.Lipi d.476 | SM d38:2     | SM (d38:2)                                              |                        | [M+Ac-H]- | 5.623 | 815.63   |
| Set -10 | Sphingomyelin        | UCD.Lipi d.478 | SM d39:2     | SM (d39:2)                                              |                        | [M+Ac-H]- | 5.988 | 829.64   |
| Set -10 | Sphingomyelin        | UCD.Lipi d.479 | SM d40:0     | SM (d40:0)                                              |                        | [M+Ac-H]- | 7.138 | 847.69   |
| Set -10 | Sphingomyelin        | UCD.Lipi d.480 | SM d40:1     | SM (d40:1)                                              | SM(d18:1_22:0)         | [M+Ac-H]- | 6.888 | 845.67   |
| Set -10 | Sphingomyelin        | UCD.Lipi d.481 | SM d40:2 A   | SM (d40:2) A                                            |                        | [M+Ac-H]- | 6.205 | 843.66   |
| Set -10 | Sphingomyelin        | UCD.Lipi d.482 | SM d40:2 B   | SM (d40:2) B                                            | SM(d18:2_22:0)         | [M+Ac-H]- | 6.306 | 843.66   |
| Set -10 | Sphingomyelin        | UCD.Lipi d.483 | SM d40:3     | SM (d40:3)                                              |                        | [M+Ac-H]- | 5.64  | 841.64   |
| Set -10 | Sphingomyelin        | UCD.Lipi d.484 | SM d41:1     | SM (d41:1)                                              | SM(d18:1_23:0)         | [M+Ac-H]- | 7.229 | 859.69   |
| Set -10 | Sphingomyelin        | UCD.Lipi d.485 | SM d41:2     | SM (d41:2)                                              | SM(d18:2_23:0)         | [M+Ac-H]- | 6.65  | 857.67   |
| Set -10 | Sphingomyelin        | UCD.Lipi d.486 | SM d42:0     | SM (d42:0)                                              |                        | [M+Ac-H]- | 7.794 | 875.72   |
| Set -10 | Sphingomyelin        | UCD.Lipi d.487 | SM d42:1     | SM (d42:1)                                              | SM(d18:1_24:0)         | [M+Ac-H]- | 7.562 | 873.71   |
| Set -11 | Glactoylceramide     | UCD.Lipi d.117 | LacCer d34:1 | Gal-Gal-Cer(d18:1/16:0) or Lactosylceramide(d18:1/16:0) |                        | [M+H]+    | 4.795 | 862.625  |
| Set -11 | Lactosylceramide     | UCD.Lipi d.118 | LacCer d32:2 | Lactosylceramide (d18:1/24:1(15Z))                      |                        | [M+H]+    | 6.685 | 972.7346 |
| Set -11 | Cholesteroyl ester   | UCD.Lipi d.12  | CE 18:2      | CE (18:2)                                               | 18:2 Cholesteryl ester | [M+N H4]+ | 10.4  | 666.6184 |
| Set -11 | Phosphatidylcholine  | UCD.Lipi d.155 | PC o-34:0    | PC (o-34:0)                                             |                        | [M+H]+    | 6.478 | 748.6204 |
| Set -11 | Phosphatidylcholine  | UCD.Lipi d.156 | PC p-32:1    | PC (p-32:1) or PC (o-32:2)                              |                        | [M+H]+    | 4.91  | 716.5626 |
| Set -11 | Phosphatidylcholine  | UCD.Lipi d.157 | PC p-34:1    | PC (p-34:1) or PC (o-34:2) B                            | PC(P-16:0_18:1)        | [M+H]+    | 5.79  | 744.5908 |
| Set -11 | Phosphatidylcholine  | UCD.Lipi d.160 | PC p-40:1    | PC (p-40:1) or PC (o-40:2)                              |                        | [M+H]+    | 6.637 | 828.6842 |
| Set -11 | Sphingomyelin        | UCD.Lipi d.170 | SM d34:0     | SM (d34:0)                                              |                        | [M+H]+    | 4.96  | 705.5905 |
| Set -11 | Glucosylceramide     | UCD.Lipi d.363 | GlcCer d38:1 | GlcCer (d38:1)                                          |                        | [M+Ac-H]- | 6.489 | 814.64   |
| Set -11 | Glucosylceramide     | UCD.Lipi d.364 | GlcCer d40:1 | GlcCer (d40:1)                                          | GlcCer[NS](d18:1_22:0) | [M+Ac-H]- | 7.163 | 842.67   |
| Set -11 | Glucosylceramide     | UCD.Lipi d.365 | GlcCer d41:1 | GlcCer (d41:1)                                          |                        | [M+Ac-H]- | 7.495 | 856.69   |
| Set -11 | Glucosylceramide     | UCD.Lipi d.366 | GlcCer d42:1 | GlcCer (d42:1)                                          | GlcCer[NS](d18:1_24:0) | [M+Ac-H]- | 7.82  | 870.7    |
| Set -11 | Glucosylceramide     | UCD.Lipi d.367 | GlcCer d42:2 | GlcCer (d42:2)                                          | GlcCer[NS](d18:1_24:1) | [M+Ac-H]- | 7.138 | 868.69   |

|         |                     |                |           |                            |                     |             |           |              |
|---------|---------------------|----------------|-----------|----------------------------|---------------------|-------------|-----------|--------------|
| Set -11 | Phosphatidylcholine | UCD.Lipi d.412 | PC o-32:0 | PC (o-32:0)                |                     | [M+Ac-H]-   | 5.9<br>73 | 778.5<br>9   |
| Set -11 | Phosphatidylcholine | UCD.Lipi d.414 | PC p-34:0 | PC (p-34:0) or PC (o-34:1) | PC(P-18:0_16:0)     | [M+Ac-H]-   | 6.0<br>39 | 804.6<br>1   |
| Set -11 | Sphingomyelin       | UCD.Lipi d.467 | SM d34:1  | SM (d34:1)                 | SM(d18:1_16:0)      | [M+Ac-H]-   | 4.8<br>66 | 761.5<br>8   |
| Set -12 | Diacylglycerol      | UCD.Lipi d.111 | DG 36:4   | DG (36:4)                  | DG(18:2_18:2)       | [M+N H4]+   | 5.8<br>15 | 634.5<br>404 |
| Set -12 | Diacylglycerol      | UCD.Lipi d.112 | DG 36:5   | DG (36:5)                  | DG(18:2_18:3)       | [M+N H4]+   | 5.6<br>5  | 632.5<br>248 |
| Set -12 | Triacylglycerol     | UCD.Lipi d.206 | TG 51:4   | TG (51:4)                  | TG(15:0_18:2_18:2)  | [M+Na ]+    | 9.8<br>77 | 863.7<br>099 |
| Set -12 | Triacylglycerol     | UCD.Lipi d.207 | TG 51:5   | TG (51:5)                  | TG(15:0_18:2_18:3)  | [M+N H4]+   | 9.7<br>7  | 856.7<br>347 |
| Set -12 | Triacylglycerol     | UCD.Lipi d.212 | TG 52:4   | TG (52:4)                  | TG(16:1_18:1_18:2)  | [M+N H4]+   | 10.<br>1  | 872.7<br>702 |
| Set -12 | Triacylglycerol     | UCD.Lipi d.213 | TG 52:5   | TG (52:5)                  | TG(16:0_18:2_18:3)  | [M+N H4]+   | 9.7<br>28 | 870.7<br>545 |
| Set -12 | Triacylglycerol     | UCD.Lipi d.214 | TG 52:6   | TG (52:6)                  | TG(16:1_18:2_18:3)  | [M+Na ]+    | 9.3<br>5  | 873.6<br>943 |
| Set -12 | Triacylglycerol     | UCD.Lipi d.218 | TG 53:4   | TG (53:4)                  | TG(17:1_18:1_18:2)  | [M+N H4]+   | 10.<br>32 | 886.7<br>858 |
| Set -12 | Triacylglycerol     | UCD.Lipi d.219 | TG 53:5   | TG (53:5)                  | TG(17:1_18:2_18:2)  | [M+N H4]+   | 9.9<br>02 | 884.7<br>702 |
| Set -12 | Triacylglycerol     | UCD.Lipi d.223 | TG 54:3   | TG (54:3)                  | TG(18:0_18:1_18:2)  | [M+N H4]+   | 10.<br>86 | 902.8<br>171 |
| Set -12 | Triacylglycerol     | UCD.Lipi d.224 | TG 54:4   | TG (54:4)                  | TG(18:1_18:1_18:2)  | [M+N H4]+   | 10.<br>49 | 900.8<br>015 |
| Set -12 | Triacylglycerol     | UCD.Lipi d.225 | TG 54:5   | TG (54:5)                  | TG(18:1_18:2_18:2)  | [M+Na ]+    | 10.<br>12 | 903.7<br>412 |
| Set -12 | Triacylglycerol     | UCD.Lipi d.226 | TG 54:6   | TG (54:6)                  | TG(18:1_18:2_18:3)  | [M+Na ]+    | 9.7<br>45 | 901.7<br>256 |
| Set -12 | Triacylglycerol     | UCD.Lipi d.227 | TG 54:8   | TG (54:8)                  | TG(18:2_18:3_18:3)  | [M+Na ]+    | 8.9<br>4  | 897.6<br>943 |
| Set -13 | Triacylglycerol     | UCD.Lipi d.228 | TG 56:1   | TG (56:1)                  | TG(18:0_18:1_20:0)  | [M+N H4]+   | 11.<br>85 | 934.8<br>797 |
| Set -13 | Triacylglycerol     | UCD.Lipi d.237 | TG 57:1   | TG (57:1)                  |                     | [M+N H4]+   | 12        | 948.8<br>863 |
| Set -13 | Triacylglycerol     | UCD.Lipi d.238 | TG 57:2   | TG (57:2)                  |                     | [M+N H4]+   | 11.<br>88 | 946.8<br>718 |
| Set -13 | Triacylglycerol     | UCD.Lipi d.239 | TG 58:1   | TG (58:1)                  | TG(18:0_18:1_22:0)  | [M+N H4]+   | 11.<br>99 | 962.9<br>11  |
| Set -13 | Triacylglycerol     | UCD.Lipi d.241 | TG 58:2   | TG (58:2)                  | TG(18:1_18:1_22:0)  | [M+N H4]+   | 11.<br>85 | 960.8<br>954 |
| Set -13 | Triacylglycerol     | UCD.Lipi d.242 | TG 58:3   | TG (58:3)                  | TG(18:1_20:1_20:1)  | [M+N H4]+   | 11.<br>6  | 958.8<br>797 |
| Set -13 | Triacylglycerol     | UCD.Lipi d.247 | TG 59:2   | TG (59:2)                  |                     | [M+N H4]+   | 12        | 974.9<br>031 |
| Set -13 | Triacylglycerol     | UCD.Lipi d.248 | TG 59:3   | TG (59:3)                  |                     | [M+N H4]+   | 11.<br>89 | 972.8<br>871 |
| Set -13 | Triacylglycerol     | UCD.Lipi d.250 | TG 60:2   | TG (60:2)                  | TG(18:1_20:1_22:0)  | [M+N H4]+   | 11.<br>99 | 988.9<br>267 |
| Set -13 | Triacylglycerol     | UCD.Lipi d.251 | TG 60:3   | TG (60:3)                  | TG(18:1_20:1_22:1)  | [M+N H4]+   | 11.<br>95 | 986.9<br>034 |
| Set -13 | Triacylglycerol     | UCD.Lipi d.252 | TG 60:4   | TG (60:4)                  | TG(18:1_20:2_22:1)  | [M+N H4]+   | 11.<br>78 | 984.8<br>877 |
| Set -13 | Triacylglycerol     | UCD.Lipi d.254 | TG 62:3   | TG (62:3)                  |                     | [M+N H4]+   | 12.<br>04 | 1014.<br>934 |
| Set -13 | Triacylglycerol     | UCD.Lipi d.255 | TG 62:4   | TG (62:4)                  |                     | [M+N H4]+   | 11.<br>94 | 1012.<br>918 |
| Set -13 | Triacylglycerol     | UCD.Lipi d.256 | TG 64:4   | TG (64:4)                  |                     | [M+N H4]+   | 12.<br>04 | 1040.<br>949 |
| Set -14 | Ceramide            | UCD.Lipi d.18  | Cer d41:1 | Ceramide (d18:1/23:0)      | Cer[NS](d18:1_23:0) | [M+H]<br>+  | 7.9<br>63 | 636.6<br>289 |
| Set -14 | Ceramide            | UCD.Lipi d.263 | Cer d38:1 | Ceramide (d38:1)           | Cer[NS](d18:1_20:0) | [M+Cl]<br>- | 7.1<br>63 | 628.5<br>4   |
| Set -14 | Ceramide            | UCD.Lipi d.264 | Cer d39:1 | Ceramide (d39:1)           | Cer[NS](d18:1_22:0) | [M+Cl]<br>- | 7.5<br>12 | 642.5<br>6   |

|         |                          |               |             |                              |                      |            |           |              |
|---------|--------------------------|---------------|-------------|------------------------------|----------------------|------------|-----------|--------------|
| Set -14 | Ceramide                 | UCD.Lipid.265 | Cer d40:0   | Ceramide (d40:0)             | Cer[NDS](d18:0_22:0) | [M+Ac-H]-  | 8.0<br>61 | 682.6<br>3   |
| Set -14 | Ceramide                 | UCD.Lipid.266 | Cer d40:1   | Ceramide (d40:1)             | Cer[NS](d18:1_22:0)  | [M+Cl]-    | 7.8<br>36 | 656.5<br>8   |
| Set -14 | Ceramide                 | UCD.Lipid.267 | Cer d40:2   | Ceramide (d40:2)             | Cer[NS](d18:2_22:0)  | [M+Cl]-    | 7.1<br>85 | 654.5<br>6   |
| Set -14 | Ceramide                 | UCD.Lipid.268 | Cer d41:1   | Ceramide (d41:1)             | Cer[NS](d18:1_23:0)  | [M+Cl]-    | 8.1<br>61 | 670.5<br>9   |
| Set -14 | Ceramide                 | UCD.Lipid.269 | Cer d42:0   | Ceramide (d42:0)             | Cer[NDS](d18:0_24:0) | [M+Cl]-    | 8.6<br>85 | 686.6<br>2   |
| Set -14 | Ceramide                 | UCD.Lipid.270 | Cer d42:1   | Ceramide (d42:1)             | Cer[NS](d18:1_24:0)  | [M+Ac-H]-  | 8.4<br>69 | 708.6<br>5   |
| Set -14 | Ceramide                 | UCD.Lipid.271 | Cer d42:2 A | Ceramide (d42:2) A           | Cer[NS](d18:1_24:1)  | [M+Cl]-    | NA        | NA           |
| Set -14 | Ceramide                 | UCD.Lipid.273 | Cer d44:1   | Ceramide (d44:1)             |                      | [M+Cl]-    | 9.0<br>68 | 712.6<br>4   |
| Set -15 | Phosphatidylcholine      | UCD.Lipid.159 | PC p-38:4   | PC (p-38:4) or PC (o-38:5) B | PC(P-18:0_20:4)      | [M+H]+     | 5.8<br>23 | 794.6<br>054 |
| Set -15 | Phosphatidylethanolamine | UCD.Lipid.167 | PE 38:4     | PE (38:4)                    | PE(18:0_20:4)        | [M+H]+     | 5.7<br>23 | 768.5<br>56  |
| Set -15 | Phosphatidylcholine      | UCD.Lipid.413 | PC p-32:0   | PC (p-32:0) or PC (o-32:1)   | PC(P-16:0_16:0)      | [M+Ac-H]-  | 5.8<br>81 | 776.5<br>8   |
| Set -15 | Phosphatidylcholine      | UCD.Lipid.415 | PC p-34:1   | PC (p-34:1) or PC (o-34:2) A | PC(P-16:0_18:1)      | [M+Ac-H]-  | 5.5<br>4  | 802.6        |
| Set -15 | Phosphatidylcholine      | UCD.Lipid.416 | PC p-34:2   | PC (p-34:2) or PC (o-34:3)   | PC(P-16:0_18:2)      | [M+Ac-H]-  | 5.4<br>4  | 800.5<br>8   |
| Set -15 | Phosphatidylcholine      | UCD.Lipid.417 | PC p-36:1   | PC (p-36:1) or PC (o-36:2)   | PC(P-18:0_18:1)      | [M+Ac-H]-  | 6.2       | 830.6<br>3   |
| Set -15 | Phosphatidylcholine      | UCD.Lipid.418 | PC p-36:2   | PC (p-36:2) or PC (o-36:3)   | PC(P-18:0_18:2)      | [M+Ac-H]-  | 5.5<br>9  | 828.6<br>1   |
| Set -15 | Phosphatidylcholine      | UCD.Lipid.419 | PC p-36:3   | PC (p-36:3) or PC (o-36:4)   | PC(P-16:0_20:3)      | [M+Ac-H]-  | 5.4<br>4  | 826.6        |
| Set -15 | Phosphatidylcholine      | UCD.Lipid.420 | PC p-36:4   | PC (p-36:4) or PC (o-36:5)   | PC(P-16:0_20:4)      | [M+Ac-H]-  | 5.3<br>32 | 824.5<br>8   |
| Set -15 | Phosphatidylcholine      | UCD.Lipid.422 | PC p-38:4   | PC (p-38:4) or PC (o-38:5) A | PC(P-18:0_20:4)      | [M+Ac-H]-  | 5.4<br>82 | 852.6<br>1   |
| Set -15 | Phosphatidylcholine      | UCD.Lipid.423 | PC p-38:5   | PC (p-38:5) or PC (o-38:6)   | PC(P-18:0_20:5)      | [M+Ac-H]-  | 5.2<br>57 | 850.6        |
| Set -16 | Acylcarnitine            | UCD.Lipid.1   | AC C8:0     | Acylcarnitine C8:0           | Acylcarnitine 8:0    | [M+H]+     | 0.5<br>5  | 288.2<br>169 |
| Set -16 | Acylcarnitine            | UCD.Lipid.2   | AC C8:1     | Acylcarnitine C8:1           | Acylcarnitine 8:1    | [M+H]+     | 0.5<br>2  | 286.2<br>013 |
| Set -16 | Cholesterol              | UCD.Lipid.20  | Cholesterol | Cholesterol                  |                      | [M-H2O+H]+ | 4.8<br>61 | 369.3<br>516 |
| Set -16 | Acylcarnitine            | UCD.Lipid.3   | AC C10:1    | Acylcarnitine C10:1          | Acylcarnitine 10:1   | [M+H]+     | 0.5<br>9  | 314.2<br>326 |
| Set -16 | Acylcarnitine            | UCD.Lipid.4   | AC C12:0    | Acylcarnitine C12:0          | Acylcarnitine 12:0   | [M+H]+     | 0.7<br>4  | 344.2<br>801 |
| Set -16 | Acylcarnitine            | UCD.Lipid.5   | AC C16:0    | Acylcarnitine C16:0          | Acylcarnitine 16:0   | [M+H]+     | 1.5<br>86 | 400.3<br>42  |
| Set -16 | Fatty acid               | UCD.Lipid.519 | FA 24:1     | FA (24:1)                    | FA (24:1)            | [M-H]-     | 4.5<br>2  | 365.3<br>4   |
| Set -16 | Acylcarnitine            | UCD.Lipid.6   | AC C18:0    | Acylcarnitine C18:0          | Acylcarnitine 18:0   | [M+H]+     | 2.3<br>4  | 428.3<br>727 |
| Set -16 | Acylcarnitine            | UCD.Lipid.7   | AC C18:1    | Acylcarnitine C18:1          | Acylcarnitine 18:1   | [M+H]+     | 1.7<br>43 | 426.3<br>578 |
| Set -16 | Acylcarnitine            | UCD.Lipid.8   | AC C18:2    | Acylcarnitine C18:2          | Acylcarnitine 18:2   | [M+H]+     | 1.3<br>29 | 424.3<br>425 |
| Set -17 | Fatty acid               | UCD.Lipid.497 | FA 14:1     | FA (14:1)                    | FA (14:1)            | [M-H]-     | 1.2       | 225.1<br>9   |
| Set -17 | Fatty acid               | UCD.Lipid.501 | FA 16:1     | FA (16:1)                    | FA (16:1)            | [M-H]-     | 1.8<br>2  | 253.2<br>2   |
| Set -17 | Fatty acid               | UCD.Lipid.503 | FA 17:1     | FA (17:1)                    | FA (17:1)            | [M-H]-     | 2.2<br>2  | 267.2<br>3   |
| Set -17 | Fatty acid               | UCD.Lipid.505 | FA 18:1     | FA (18:1)                    | FA (18:1)            | [M-H]-     | 2.7       | 281.2<br>5   |



|         |                              |                |           |                            |                    |            |           |              |
|---------|------------------------------|----------------|-----------|----------------------------|--------------------|------------|-----------|--------------|
| Set -17 | Fatty acid                   | UCD.Lipi d.506 | FA 18:2   | FA (18:2)                  | FA (18:2)          | [M-H]-     | 2.0<br>5  | 279.2<br>3   |
| Set -17 | Fatty acid                   | UCD.Lipi d.507 | FA 18:3   | FA (18:3)                  | FA (18:3)          | [M-H]-     | 1.6<br>23 | 277.2<br>2   |
| Set -17 | Fatty acid                   | UCD.Lipi d.509 | FA 20:1   | FA (20:1)                  | FA (20:1)          | [M-H]-     | 3.3<br>5  | 309.2<br>8   |
| Set -17 | Fatty acid                   | UCD.Lipi d.510 | FA 20:2   | FA (20:2)                  | FA (20:2)          | [M-H]-     | 2.9<br>1  | 307.2<br>6   |
| Set -17 | Fatty acid                   | UCD.Lipi d.516 | FA 22:2   | FA (22:2)                  | FA (22:2)          | [M-H]-     | 3.4<br>7  | 335.3        |
| Set -18 | Diacylglycerol               | UCD.Lipi d.115 | DG 38:5   | DG (38:5)                  | DG(18:1_20:4)      | [M+N H4]+  | 6.2<br>46 | 660.5<br>562 |
| Set -18 | Triacylglycerol              | UCD.Lipi d.222 | TG 54:2   | TG (54:2)                  | TG(18:0_18:1_18:1) | [M+N H4]+  | 11.<br>22 | 904.8<br>328 |
| Set -18 | Triacylglycerol              | UCD.Lipi d.230 | TG 56:3   | TG (56:3)                  | TG(18:0_18:1_20:2) | [M+N H4]+  | 11.<br>22 | 930.8<br>484 |
| Set -18 | Triacylglycerol              | UCD.Lipi d.231 | TG 56:4   | TG (56:4)                  | TG(18:0_18:1_20:3) | [M+N H4]+  | 10.<br>9  | 928.8<br>328 |
| Set -18 | Triacylglycerol              | UCD.Lipi d.232 | TG 56:5   | TG (56:5)                  | TG(18:0_18:1_20:4) | [M+N H4]+  | 10.<br>78 | 926.8<br>171 |
| Set -18 | Triacylglycerol              | UCD.Lipi d.233 | TG 56:6   | TG (56:6)                  | TG(18:1_18:1_20:4) | [M+N H4]+  | 10.<br>34 | 924.8<br>015 |
| Set -18 | Triacylglycerol              | UCD.Lipi d.234 | TG 56:7   | TG (56:7)                  | TG(18:1_18:2_20:4) | [M+N H4]+  | 9.9<br>68 | 922.7<br>858 |
| Set -18 | Triacylglycerol              | UCD.Lipi d.243 | TG 58:4   | TG (58:4)                  | TG(18:1_18:2_22:1) | [M+N H4]+  | 11.<br>25 | 956.8<br>641 |
| Set -18 | Triacylglycerol              | UCD.Lipi d.244 | TG 58:6   | TG (58:6)                  | TG(18:0_18:1_22:5) | [M+N H4]+  | 10.<br>67 | 952.8<br>328 |
| Set -19 | Phosphatidylcholine          | UCD.Lipi d.147 | PC 38:5 B | PC (38:5) B                | PC(16:0_22:5)      | [M+H]<br>+ | 5.1<br>68 | 808.5<br>848 |
| Set -19 | Phosphatidylcholine          | UCD.Lipi d.151 | PC 40:5 B | PC (40:5) B                | PC(18:0_22:5)      | [M+H]<br>+ | 5.8<br>06 | 836.6<br>164 |
| Set -19 | Phosphatidylcholine          | UCD.Lipi d.152 | PC 40:6 A | PC (40:6) A                | PC(18:0_22:6)      | [M+H]<br>+ | 5.1<br>51 | 834.6<br>007 |
| Set -19 | Phosphatidylcholine          | UCD.Lipi d.153 | PC 42:5   | PC (42:5)                  |                    | [M+H]<br>+ | 6.0<br>72 | 864.6<br>45  |
| Set -19 | Phosphatidylcholine          | UCD.Lipi d.154 | PC 42:6   | PC (42:6)                  |                    | [M+H]<br>+ | 5.7<br>73 | 862.6<br>311 |
| Set -19 | Phosphatidylcholine          | UCD.Lipi d.405 | PC 38:5 A | PC (38:5) A                | PC(18:1_20:4)      | [M+Ac -H]- | 5.1<br>07 | 866.5<br>9   |
| Set -19 | Phosphatidylcholine          | UCD.Lipi d.408 | PC 40:5 A | PC (40:5) A                | PC(18:0_22:5)      | [M+Ac -H]- | 5.7<br>4  | 894.6<br>2   |
| Set -19 | Phosphatidylcholine          | UCD.Lipi d.411 | PC 40:8   | PC (40:8)                  | PC(18:2_22:6)      | [M+Ac -H]- | 4.5<br>33 | 888.5<br>8   |
| Set -19 | Phosphatidylinositol         | UCD.Lipi d.460 | PI 38:4   | PI (38:4)                  | PI(18:0_20:4)      | [M-H]-     | 4.6<br>06 | 885.5<br>5   |
| Set -20 | Phosphatidylcholine          | UCD.Lipi d.158 | PC p-38:2 | PC (p-38:2) or PC (o-38:3) |                    | [M+H]<br>+ | 6.2<br>12 | 798.6<br>359 |
| Set -20 | Phosphatidylcholine          | UCD.Lipi d.165 | PC p-42:3 | PC (p-42:3) or PC (o-42:4) |                    | [M+H]<br>+ | 7.2<br>24 | 852.6<br>859 |
| Set -20 | Phosphatidylcholine          | UCD.Lipi d.421 | PC p-38:3 | PC (p-38:3) or PC (o-38:4) | PC(P-18:0_20:3)    | [M+Ac -H]- | 6.0<br>98 | 854.6<br>3   |
| Set -20 | Phosphatidylcholine          | UCD.Lipi d.424 | PC p-40:3 | PC (p-40:3) or PC (o-40:4) |                    | [M+Ac -H]- | 6.7<br>63 | 882.6<br>6   |
| Set -20 | Phosphatidylcholine          | UCD.Lipi d.425 | PC p-40:4 | PC (p-40:4) or PC (o-40:5) | PC(P-20:0_20:4)    | [M+Ac -H]- | 6.1<br>06 | 880.6<br>4   |
| Set -20 | Phosphatidylcholine          | UCD.Lipi d.426 | PC p-42:4 | PC (p-42:4) or PC (o-42:5) | PC(P-22:0_20:4)    | [M+Ac -H]- | 6.7<br>47 | 908.6<br>7   |
| Set -20 | Phosphatidylcholine          | UCD.Lipi d.427 | PC p-42:5 | PC (p-42:5) or PC (o-42:6) |                    | [M+Ac -H]- | 6.1<br>88 | 906.6<br>6   |
| Set -20 | Phosphatidylcholine          | UCD.Lipi d.428 | PC p-44:4 | PC (p-44:4) or PC (o-44:5) |                    | [M+Ac -H]- | 7.3<br>87 | 936.7<br>1   |
| Set -21 | Lysophosphatidylcholine      | UCD.Lipi d.125 | LPC 20:4  | LPC (20:4)                 | LysoPC 20:4        | [M+H]<br>+ | 1.2<br>05 | 544.3<br>403 |
| Set -21 | Phosphatidylcholine          | UCD.Lipi d.146 | PC 38:4 B | PC (38:4) B                |                    | [M+H]<br>+ | 6.1<br>46 | 810.6<br>004 |
| Set -21 | Lysophosphatidylethanolamine | UCD.Lipi d.380 | LPE 20:4  | LPE (20:4)                 | LysoPE 20:4        | [M-H]-     | 1.3<br>13 | 500.2<br>8   |

|         |                           |                |           |                              |                 |            |           |              |
|---------|---------------------------|----------------|-----------|------------------------------|-----------------|------------|-----------|--------------|
| Set -21 | Phosphatidylcholine       | UCD.Lipi d.394 | PC 35:4   | PC (35:4)                    | PC(15:0_20:4)   | [M+Ac -H]- | 4.7<br>65 | 826.5<br>6   |
| Set -21 | Phosphatidylcholine       | UCD.Lipi d.398 | PC 36:4 B | PC (36:4) B                  | PC(16:0_20:4)   | [M+Ac -H]- | 5.0<br>74 | 840.5<br>8   |
| Set -21 | Phosphatidylcholine       | UCD.Lipi d.401 | PC 37:4   | PC (37:4)                    | PC(17:0_20:4)   | [M+Ac -H]- | 5.3<br>9  | 854.5<br>9   |
| Set -21 | Phosphatidylcholine       | UCD.Lipi d.404 | PC 38:4 A | PC (38:4) A                  | PC(18:0_20:4)   | [M+Ac -H]- | 5.7<br>06 | 868.6<br>1   |
| Set -21 | Phosphatidylcholine       | UCD.Lipi d.407 | PC 40:4   | PC (40:4)                    | PC(18:0_22:4)   | [M+Ac -H]- | 6.1<br>72 | 896.6<br>4   |
| Set -22 | Phosphatidylethanol amine | UCD.Lipi d.168 | PE p-34:1 | PE (p-34:1) or PE (o-34:2)   | PE(16:0_18:1)   | [M+H]<br>+ | 6.1<br>6  | 702.5<br>404 |
| Set -22 | Phosphatidylethanol amine | UCD.Lipi d.438 | PE p-34:2 | PE (p-34:2) or PE (o-34:3)   | PE(P-16:0_18:2) | [M-<br>H]- | 5.6<br>4  | 698.5<br>1   |
| Set -22 | Phosphatidylethanol amine | UCD.Lipi d.440 | PE p-36:2 | PE (p-36:2) or PE (o-36:3)   | PE(P-18:0_18:2) | [M-<br>H]- | 6.3<br>14 | 726.5<br>4   |
| Set -22 | Phosphatidylethanol amine | UCD.Lipi d.441 | PE p-36:4 | PE (p-36:4) or PE (o-36:5)   | PE(P-16:0_20:4) | [M-<br>H]- | 5.5<br>23 | 722.5<br>1   |
| Set -22 | Phosphatidylethanol amine | UCD.Lipi d.444 | PE p-38:3 | PE (p-38:3) or PE (o-38:4)   | PE(P-18:0_20:4) | [M-<br>H]- | 6.4<br>8  | 752.5<br>6   |
| Set -22 | Phosphatidylethanol amine | UCD.Lipi d.445 | PE p-38:4 | PE (p-38:4) or PE (o-38:5)   | PE(P-18:0_20:4) | [M-<br>H]- | 6.1<br>89 | 750.5<br>4   |
| Set -22 | Phosphatidylethanol amine | UCD.Lipi d.446 | PE p-38:5 | PE (p-38:5) or PE (o-38:6)   | PE(P-18:0_20:5) | [M-<br>H]- | 5.5<br>82 | 748.5<br>3   |
| Set -22 | Phosphatidylethanol amine | UCD.Lipi d.449 | PE p-40:5 | PE (p-40:5) or PE (o-40:6)   | PE(P-18:0_22:5) | [M-<br>H]- | 6.2<br>14 | 776.5<br>6   |
| Set -23 | Phosphatidylcholine       | UCD.Lipi d.161 | PC p-40:5 | PC (p-40:5) or PC (o-40:6)   |                 | [M+H]<br>+ | 5.7<br>4  | 820.6<br>215 |
| Set -23 | Phosphatidylcholine       | UCD.Lipi d.162 | PC p-40:6 | PC (p-40:6) or PC (o-40:7) A |                 | [M+H]<br>+ | 5.1<br>6  | 818.6<br>058 |
| Set -23 | Phosphatidylcholine       | UCD.Lipi d.163 | PC p-40:6 | PC (p-40:6) or PC (o-40:7) B |                 | [M+H]<br>+ | 5.6<br>25 | 818.6<br>058 |
| Set -23 | Phosphatidylcholine       | UCD.Lipi d.164 | PC p-40:7 | PC (p-40:7) or PC (o-40:8)   |                 | [M+H]<br>+ | 5.0<br>85 | 816.5<br>902 |
| Set -23 | Phosphatidylethanol amine | UCD.Lipi d.447 | PE p-38:6 | PE (p-38:6) or PE (o-38:7)   | PE(16:0_22:6)   | [M-<br>H]- | 5.3<br>4  | 746.5<br>1   |
| Set -23 | Phosphatidylethanol amine | UCD.Lipi d.450 | PE p-40:6 | PE (p-40:6) or PE (o-40:7)   | PE(P-18:0_22:6) | [M-<br>H]- | 5.9<br>98 | 774.5<br>4   |
| Set -23 | Phosphatidylethanol amine | UCD.Lipi d.451 | PE p-40:7 | PE (p-40:7) or PE (o-40:8)   | PE(P-18:1_22:6) | [M-<br>H]- | 5.4<br>07 | 772.5<br>3   |
| Set -24 | Phosphatidylethanol amine | UCD.Lipi d.166 | PE 36:4   | PE (36:4)                    | PE(16:0_20:4)   | [M+H]<br>+ | 5.2<br>5  | 740.5<br>184 |
| Set -24 | Phosphatidylcholine       | UCD.Lipi d.429 | PE 34:1   | PE (34:1)                    | PE(16:0_18:1)   | [M-<br>H]- | 5.8<br>31 | 716.5<br>2   |
| Set -24 | Phosphatidylethanol amine | UCD.Lipi d.430 | PE 34:2   | PE (34:2)                    | PE(16:0_18:2)   | [M-<br>H]- | 5.3<br>32 | 714.5<br>1   |
| Set -24 | Phosphatidylethanol amine | UCD.Lipi d.432 | PE 36:2   | PE (36:2)                    | PE(18:0_18:2)   | [M-<br>H]- | 5.9<br>89 | 742.5<br>4   |
| Set -24 | Phosphatidylethanol amine | UCD.Lipi d.433 | PE 36:3   | PE (36:3)                    | PE(18:1_18:2)   | [M-<br>H]- | 5.3<br>99 | 740.5<br>2   |
| Set -24 | Phosphatidylethanol amine | UCD.Lipi d.435 | PE 38:4 B | PE (38:4) B                  | PE(18:0_20:4)   | [M-<br>H]- | 5.8<br>81 | 766.5<br>4   |
| Set -24 | Phosphatidylethanol amine | UCD.Lipi d.436 | PE 38:6   | PE (38:6)                    | PE(16:0_22:6)   | [M-<br>H]- | 5.0<br>74 | 762.5<br>1   |
| Set -25 | Phosphatidylcholine       | UCD.Lipi d.140 | PC 35:3   | PC (35:3)                    |                 | [M+H]<br>+ | 4.8<br>61 | 770.5<br>694 |
| Set -25 | Phosphatidylcholine       | UCD.Lipi d.141 | PC 36:3 B | PC (36:3) B                  | PC(18:1_18:2)   | [M+H]<br>+ | 5.1<br>84 | 784.5<br>848 |
| Set -25 | Phosphatidylcholine       | UCD.Lipi d.144 | PC 37:3   | PC (37:3)                    |                 | [M+H]<br>+ | 5.4<br>25 | 798.6<br>004 |
| Set -25 | Phosphatidylcholine       | UCD.Lipi d.397 | PC 36:3 A | PC (36:3) A                  | PC(18:1_18:2)   | [M+Ac -H]- | 5.2<br>3  | 842.5<br>9   |
| Set -25 | Phosphatidylcholine       | UCD.Lipi d.402 | PC 38:2   | PC (38:2)                    | PC(20:0_18:2)   | [M+Ac -H]- | 6.3<br>89 | 872.6<br>4   |
| Set -25 | Phosphatidylcholine       | UCD.Lipi d.403 | PC 38:3   | PC (38:3)                    | PC(18:0_20:3)   | [M+Ac -H]- | 5.9<br>81 | 870.6<br>2   |
| Set -25 | Phosphatidylinositol      | UCD.Lipi d.459 | PI 38:3   | PI (38:3)                    | PI(18:0_20:3)   | [M-<br>H]- | 4.9       | 887.5<br>7   |

|         |                    |               |               |              |                        |                           |           |              |
|---------|--------------------|---------------|---------------|--------------|------------------------|---------------------------|-----------|--------------|
| Set -26 | Triacylglycerol    | UCD.Lipid.235 | TG 56:8       | TG (56:8)    | TG(18:1_18:2_20:5)     | [M+Na] <sup>+</sup>       | 9.7<br>69 | 925.7<br>256 |
| Set -26 | Triacylglycerol    | UCD.Lipid.236 | TG 56:9       | TG (56:9)    | TG(18:2_18:2_20:5)     | [M+Na] <sup>+</sup>       | 9.4<br>8  | 923.7<br>057 |
| Set -26 | Triacylglycerol    | UCD.Lipid.240 | TG 58:10      | TG (58:10)   | TG(18:2_18:2_22:6)     | [M+Na] <sup>+</sup>       | 9.3<br>96 | 949.7<br>256 |
| Set -26 | Triacylglycerol    | UCD.Lipid.245 | TG 58:8       | TG (58:8)    | TG(18:1_18:2_22:5)     | [M+N<br>H4] <sup>+</sup>  | 10.<br>17 | 948.8<br>015 |
| Set -26 | Triacylglycerol    | UCD.Lipid.246 | TG 58:9       | TG (58:9)    | TG(18:2_18:2_22:5)     | [M+Na] <sup>+</sup>       | 9.7<br>94 | 951.7<br>412 |
| Set -26 | Triacylglycerol    | UCD.Lipid.249 | TG 60:11      | TG (60:11)   |                        | [M+N<br>H4] <sup>+</sup>  | 9.6<br>45 | 970.7<br>859 |
| Set -27 | Sphingomyelin      | UCD.Lipid.172 | SM d42:2      | SM (d42:2)   | SM(d18:1_24:1)         | [M+H] <sup>+</sup>        | 6.6<br>85 | 813.6<br>873 |
| Set -27 | Sphingomyelin      | UCD.Lipid.488 | SM d42:2<br>A | SM (d42:2) A | SM(d18:1_24:1)         | [M+Ac<br>-H] <sup>-</sup> | 6.8<br>63 | 871.6<br>9   |
| Set -27 | Sphingomyelin      | UCD.Lipid.489 | SM d42:3      | SM (d42:3)   | SM(d18:2_24:1)         | [M+Ac<br>-H] <sup>-</sup> | 6.2<br>89 | 869.6<br>8   |
| Set -27 | Sphingomyelin      | UCD.Lipid.492 | SM d44:2      | SM (d44:2)   |                        | [M+Ac<br>-H] <sup>-</sup> | 7.5<br>28 | 899.7<br>2   |
| Set -28 | Cholesteroyl ester | UCD.Lipid.11  | CE 18:1       | CE (18:1)    | 18:1 Cholesteryl ester | [M+Na] <sup>+</sup>       | 10.<br>88 | 673.5<br>894 |
| Set -28 | Cholesteroyl ester | UCD.Lipid.13  | CE 18:3       | CE (18:3)    | 18:3 Cholesteryl ester | [M+Na] <sup>+</sup>       | 9.9<br>85 | 669.5<br>581 |
| Set -28 | Cholesteroyl ester | UCD.Lipid.14  | CE 20:3       | CE (20:3)    | 20:3 Cholesteryl ester | [M+N<br>H4] <sup>+</sup>  | 10.<br>49 | 692.6<br>34  |
| Set -28 | Cholesteroyl ester | UCD.Lipid.15  | CE 20:4       | CE (20:4)    | 20:4 Cholesteryl ester | [M+Na] <sup>+</sup>       | 10.<br>16 | 695.5<br>738 |
|         |                    |               |               |              |                        |                           |           |              |
